1 Article

## 2 Transmembrane polar relay drives the allosteric 3 regulation for ABCG5/G8 sterol transporter.

4 Bala M. Xavier <sup>1,4,5</sup>, Aiman A. Zein <sup>1,4,5</sup>, Angelica Venes <sup>1,2</sup>, Junmei Wang <sup>3,\*</sup>, and Jyh-Yeuan Lee <sup>1,\*</sup>

5 <sup>1</sup> Department of Biochemistry, Microbiology and Immunology, Faculty of Medicine, University of Ottawa,  
6 ON, Canada.

7 <sup>2</sup> Biomedical Sciences Program, Department of Biology, Faculty of Science, University of Ottawa, ON,  
8 Canada.

9 <sup>3</sup> Department of Pharmaceutical Sciences, School of Pharmacy, University of Pittsburgh, Pittsburgh, PA,  
10 USA.

11 <sup>4</sup> Contributed equally.

12 <sup>5</sup> Current address: Department of Cellular and Molecular Medicine, Faculty of Medicine, University of  
13 Ottawa, ON, Canada.

14 \* Correspondence: [junmei.wang@pitt.edu](mailto:junmei.wang@pitt.edu) and [Jyh-Yeuan.Lee@uOttawa.ca](mailto:Jyh-Yeuan.Lee@uOttawa.ca); Tel.: +1-412-383-3268 (J.W.) and  
15 +1-613-562-5800 x8308 (J.-Y.L.)

16

17 **Abstract:** The heterodimeric ATP-binding cassette (ABC) sterol transporter, ABCG5/G8, is  
18 responsible for the biliary and transintestinal secretion of cholesterol and dietary plant sterols.  
19 Missense mutations of ABCG5/G8 can cause sitosterolemia, a loss-of-function disorder  
20 characterized by plant sterol accumulation and premature atherosclerosis. A new molecular  
21 framework was recently established by a crystal structure of human ABCG5/G8 and reveals a  
22 network of polar and charged amino acids in the core of the transmembrane domains, namely polar  
23 relay. In this study, we utilize genetic variants to dissect the mechanistic role of this transmembrane  
24 polar relay in controlling ABCG5/G8 function. We demonstrated a sterol-coupled ATPase activity  
25 of ABCG5/G8 by cholesteryl hemisuccinate (CHS), a relatively water-soluble cholesterol mimetic,  
26 and characterized CHS-coupled ATPase activity of three loss-of-function missense variants, R543S,  
27 E146Q, and A540F, which are respectively within, in contact with, and distant from the polar relay.  
28 The results established an *in vitro* phenotype of the loss-of-function and missense mutations of  
29 ABCG5/G8, showing significantly impaired ATPase activity and loss of energy sufficient to weaken  
30 the signal transmission from the transmembrane domains. Our data provide a biochemical evidence  
31 underlying the importance of the polar relay and its network in regulating the catalytic activity of  
32 ABCG5/G8 sterol transporter.

33 **Keywords:** ABCG5, ABCG8, ATP-binding cassette transporter, cholesterol, polar relay,  
34 sitosterolemia.

35

36

## 37 1. Introduction

38 All living cells depend on the ability to translocate nutrients, metabolites, and other molecules  
39 across their membranes. One major way to achieve this is through membrane-anchored transporter  
40 proteins. The evolutionarily conserved ATP-binding cassette (ABC) transporter superfamily, for  
41 example, carry out ATP-dependent and active transport of a wide range of substances across cellular  
42 membranes, including both hydrophilic and hydrophobic molecules such as sugars, peptides,  
43 antibiotics, or cholesterol [1–4]. As a key component of cellular membranes, cholesterol constitutes  
44 ~50% of cellular lipid content; it is also the precursor of steroid hormones that modulate gene  
45 regulation and bile acids that enable nutrient absorption. Translocation of cholesterol molecules on  
46 biological membranes plays an essential role in maintaining cellular and whole-body cholesterol  
47 homeostasis. Thus, excess cholesterol needs to be eliminated from cells and tissues through either  
48 sterol acceptors in the circulation or direct excretion into the bile or the gut [5,6]. A large body of  
49 evidence indicates that ABC sterol transporters regulate cholesterol metabolism, and their defects are  
50 associated with dysregulation of whole-body cholesterol homeostasis, a major risk factor for  
51 cardiovascular diseases [7,8]. Yet we have almost no understanding of how these transporters  
52 actually translocate cholesterol molecules and how the sterol-transport process is controlled by ATP  
53 catalysis. Given the dysregulation of cholesterol metabolism as a major risk factor for cardiovascular  
54 disease, there is a pressing need to elucidate of mechanism of these transporters in moving molecules  
55 across the cell membranes.

56  
57 Recent progress in solving a heterodimeric crystal structure of human ABCG5 and ABCG8  
58 establishes a new molecular framework towards such a mechanistic understanding of ABC sterol  
59 transporters. ABCG5 and ABCG8 are half-sized ABC sterol transporters and co-expressed on the  
60 apical surface of the hepatocytes along the bile ducts and the enterocytes from the intestinal brush-  
61 boarder membranes [9,10]. ABCG5 and ABCG8 function as obligate heterodimers (ABCG5/G8) and  
62 serve as the primary and indispensable sterol-efflux pump that effectively exports excess cholesterol,  
63 non-cholesterol sterols, and dietary plant sterols into the bile and the intestinal lumen. In mammals,  
64 most cholesterol is eliminated by its metabolism into bile acids or via biliary secretion as free  
65 cholesterol. The latter is considered as the last step of reverse cholesterol transport (RCT), where  
66 ABCG5/G8 accounts for more than 75% biliary cholesterol secretion [11–14]. Recent studies have  
67 shown that in human subjects and animal models, ABCG5/G8 is also responsible for eliminating  
68 neutral sterols by the transintestinal cholesterol efflux (TICE), a cholesterol-lowering process  
69 independent of RCT [15]. Physiologically, ABCG5/G8 thus plays an essential role in controlling  
70 cholesterol homeostasis in our bodies.

71  
72 In general, the smallest functional unit of an ABC transporter consists of two transmembrane  
73 domains (TMD1 and TMD2) and two nucleotide-binding domains (NBD1 and NBD2), and both  
74 NBDs concertedly bind and hydrolyze ATP to provide the energy and drive substrate transport. The  
75 TMDs, on the other hand, have shown to share low sequence similarity in the amino acid sequences  
76 and three-dimensional structural folds, suggesting substrate-specific mechanisms for individual  
77 transporters [16]. Mechanistic analyses of ABC cholesterol transporters have largely centered on  
78 sequence requirement at the canonical ATP-binding sites [17–20], whereas limited is known about  
79 sterol-protein interaction and its relationship with the ATP catalysis. Recent progress solving a crystal  
80 structure of human ABCG5/G8 revealed a unique TMD fold and several structural motifs [21]. Of  
81 particular, for each subunit, a network of polar and charged amino acids is present in the core of the  
82 TMD, namely polar relay, whose role remains to be characterized. A triple-helical bundle is located  
83 at the transmission interface between the NBD and the TMD and consists of an elbow connecting  
84 helix, a hot-spot helix (also known as E-helix), and an intracellular loop-1 (ICL1) coupling helix.  
85 However, on the triple-helical bundle or the transmembrane polar relay, several residues have been  
86 shown to bear disease-causing missense mutations from sitosterolemia or other metabolic disorders  
87 with lipid phenotypes (**Figure 1A**). Notably, several disease-causing mutations are clustered in the  
88 membrane-spanning region or at the NBD-TMD interface [8,22]. This suggests the unique roles of

89 these structural motifs in regulating the ABCG5/G8 function; yet, no prior knowledge was available  
90 to explain the role of these structural motifs in the sterol-transport function.

91  
92 Loss-of-function (LOF) mutations in ABCG5 or ABCG8 are linked to sitosterolemia, a rare  
93 autosomal recessive disease, while several other missense mutations are also associated with other  
94 lipid disorders, such as gallstone formation or elevated LDL cholesterol [23–28]. At the cellular level,  
95 many of the missense mutations lead to defects in post-translational trafficking of ABCG5/G8 from  
96 the endoplasmic reticulum (ER), an abnormality commonly observed in other ABC transporters with  
97 missense mutations, *e.g.*,  $\Delta F508$  mutation in the cystic fibrosis transmembrane conductance regulator  
98 (CFTR or ABCC7) [29,30]. However, specific missense mutants of ABCG5/G8 heterodimers have  
99 shown no defect in protein maturation [29], suggesting alternative disease-causing mechanisms.  
100 Therefore, studies of these mutants will not only show how they alter the transporter activity, but  
101 will also provide mechanistic insights into the function of wild-type (WT) ABCG5/G8 sterol  
102 transporter.

103  
104 Disease mutations are instrumental in studying the mechanisms of affected proteins *in vitro*, *e.g.*,  
105 familial hypercholesterolemia mutations for proteins involved in low-density lipoprotein  
106 metabolism [31]. Guided by the structural framework of ABCG5/G8, we can now investigate its  
107 mechanisms using enzymological approaches with purified proteins. For this, we first need to  
108 establish at least one robust and consistent *in vitro* functional assay. Using ATPase activity as the  
109 functional benchmark in this study, we have optimized an *in vitro* colorimetric ATPase assay that  
110 allows high-throughput activity assessment of detergent-purified ABCG5/G8. Using a soluble  
111 cholesterol mimetic, cholesteryl hemisuccinate (CHS), we report here the CHS-stimulated ATP  
112 hydrolysis by ABCG5/G8 proteo-micelles, consisting of phospholipids, cholate, and dodecyl-  
113 maltoside (DDM), and present an enzymatic analysis for the sterol-coupled ATPase activity on  
114 ABCG5/G8 sterol transporter. Using ATPase activity as functional readout of ABCG5/G8, we show  
115 differentially inhibition of the CHS-stimulated ATPase activity by three LOF missense mutants, two  
116 sitosterolemia mutations and one sterol-binding mutation, where residues bearing the two disease  
117 mutations are located along the polar relay. Our data hereby demonstrate the mechanistic basis on  
118 regulating ABCG5/G8 function by the transmembrane polar relay (**Figure 1B**).

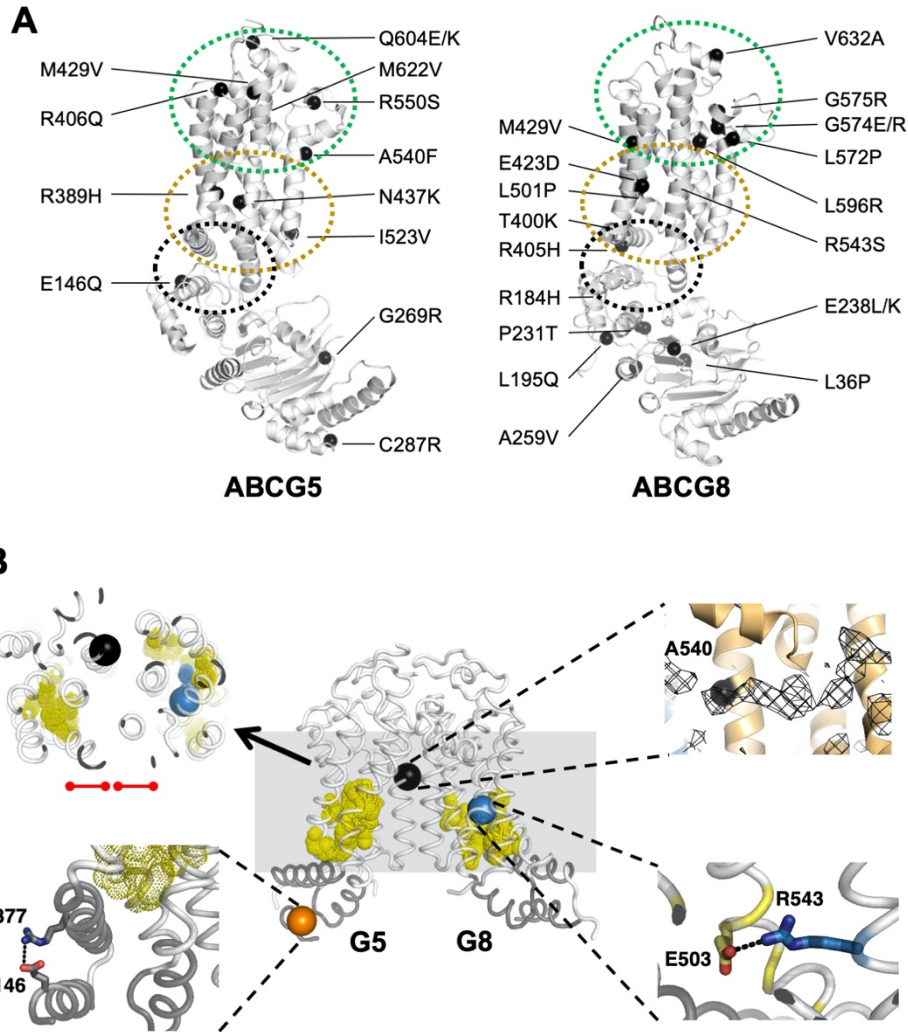

119

120  
121  
122  
123  
124  
125  
126  
127  
128  
129  
130  
131  
132  
133  
134  
135  
136  
137

**Figure 1. Disease-causing mutations and SNPs in ABCG5/G8.**

**A**, Localization of ABCG5/G8 residues carrying missense mutations. The positions of disorder-related polymorphisms or mutations are highlighted in black spheres on the structures of ABCG5 (PDB ID: 5D07, chain C) and ABCG8 (PDB ID 5D07, chain D). Structural motifs are indicated in dashed ovals: triple-helical bundle (black), TMD polar relay (yellow), and extracellular domain with re-entry helices (green). **B**, Microenvironment of G5-E146, G5-A540, and G8-R543. (*Middle*) The transmembrane domains (white) and the triple helical bundle (grey) are plotted in tube-styled cartoon presentation, showing the  $\alpha$ -carbons (spheres) of G5-E146 (orange), G8-R543 (blue), and G5-A540 (black). The polar relays are plotted in dotted yellow spheres. (*Top-left*) Slapped top view shows G5-A540 situated more than 10Å away from the polar relay of either subunit (red dot-ended lines). (*Top-right*) Near G5-A540 shows a cholesterol-shaped electron density (mesh) in the crystal structure of ABCG5/G8. Fo-Fc difference electron density map was contoured at 3.0 $\sigma$ . (*Bottom-left*) At the triple helical bundle of ABCG5, E146 interacts with R377 through their side-chain termini in a distance of hydrogen bonding, 3.5Å (black dashed line). (*Bottom-right*) In ABCG8 polar relay, R543 interacts E503 through their side-chain termini in a distance of hydrogen bonding, 3.1Å (black dashed line).

## 138 2. Results

139 **2.1. CHS stimulates ATP hydrolysis by wild-type (WT) ABCG5/G8.** Despite the known physiological  
140 role of ABCG5/G8 in biliary and intestinal cholesterol secretion, only indirect evidence of sterol-  
141 coupled transporter activity was detected by using steroid mimetics, such as androstan or bile acids  
142 [32,33]. In this study, we investigated a direct sterol-coupled ATPase activity by using CHS, a  
143 cholesterol mimetic that is more soluble in aqueous solution. First, to overcome low sensitivity of  
144 detecting the ABCG5/G8 ATPase activity by previous protocols, we have optimized the ATPase assay  
145 for ABCG5/G8 by adopting a previous assay [34] and a colorimetric bismuth citrate-based detection  
146 approach [35]. As described and explained in Materials and Methods, this optimized assay  
147 significantly reduces the background noise due to cloudiness by phospholipid/cholate/DDM  
148 mixtures, which improves the detecting sensitivity of liberated inorganic phosphate within the first  
149 few minutes and allows us to calculate more accurate rates of ATP hydrolysis. We show here that  
150 CHS can significantly stimulate ABCG5/G8-mediated ATP hydrolysis when co-incubated with  
151 sodium cholate (a bile acid) and *E. coli* polar lipids (**Figure 2**). Using 5 mM of ATP, the basal activity  
152 of ABCG5/G8 was calculated as  $160 \pm 15$  nmol/min/mg ( $n = 4$ ), similar to reported values, whereas in  
153 the presence of CHS, the specific ATPase activity of ABCG5/G8 reached  $565 \pm 30$  nmol/min/mg ( $n =$   
154  $8$ ), three-four times higher than that in the absence of CHS (**Figures 3A & 3B**). Absence of cholate was  
155 unable to activate the ATP hydrolysis, consistent with the previous studies (data not shown) [33]. In  
156 addition, the activity was inhibited either by orthovanadate, an ATPase inhibitor [36] (**Figure 3C**), or  
157 by a catalytically-deficient mutant ABCG5<sup>WT</sup>/G8<sup>G216D</sup> (G8-G216D) [18], which displayed no ATP  
158 hydrolysis (**Figures 3A & 3B**). The specific activity of ATP hydrolysis by ABCG5/G8 is by far the  
159 highest in comparison with the previously reported values [33].

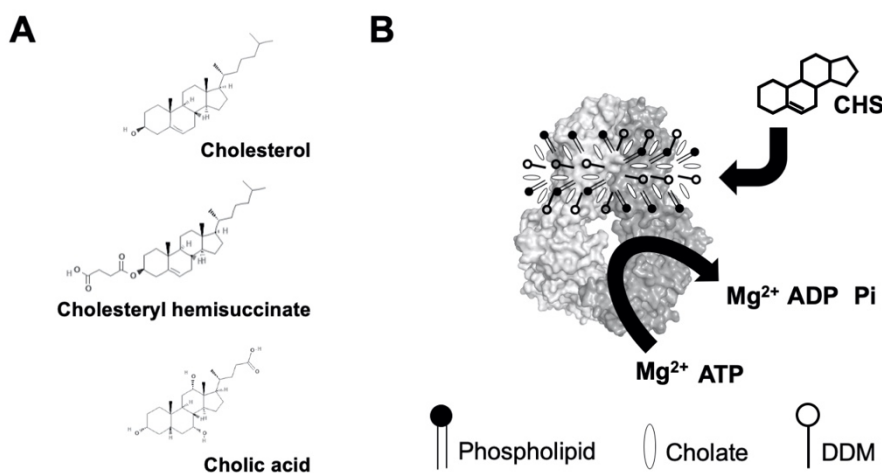

160

161 **Figure 2. A**, Chemical structures of cholesterol, cholesteryl hemisuccinate (CHS) and cholic acid  
162 (cholate). Source: PubChem. **B**, Schematic illustration of sterol-coupled ATPase activity of  
163 ABCG5/G8. DDM-purified ABCG5/G8 (light/dark grey surface) is preincubated with phospholipids  
164 and cholate. Addition of CHS (four-ringed steroid structure) stimulates hydrolysis of ATP to ADP  
165 and inorganic phosphate (Pi) in the presence of the divalent magnesium ions (Mg<sup>2+</sup>). Using the  
166 colorimetric and bismuth citrate-based assay, the liberated Pi is then captured by ammonium  
167 molybdate in the presence ascorbic acid. The color is developed upon mixing with bismuth citrate  
168 and sodium citrate, and the absorbance was measured at 695 nm. See details in Materials and  
169 Methods.

170

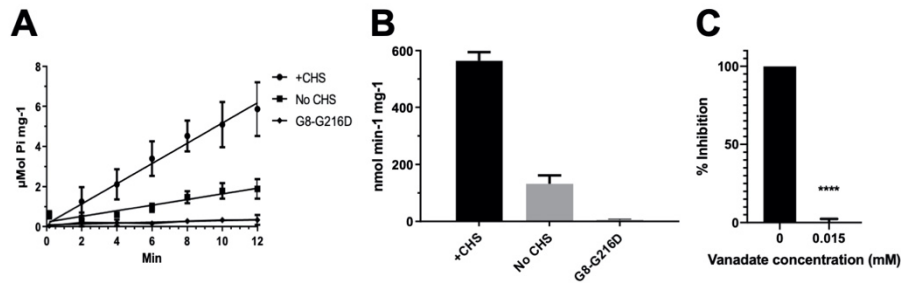

171

172

**Figure 3. ATPase activity of ABCG5/G8.**

173 The ATP hydrolysis was used as a measure of ABCG5/G8 ATPase activity at 37°C in a condition with  
174 5mM ATP and 4.1mM CHS. The protocol is entailed in Materials and Methods. **A**, Data points are  
175 presented as the means  $\pm$  standard deviations from four-to-eight independent experiments using  
176 two-to-four independently purified proteins, where not visible, the error bars are covered by the plot  
177 symbols. A linear regression, plotted from the first 12 minutes, is used to calculate the specific  
178 activities. **B**, Bar graphs show the specific activities of ATP hydrolysis by WT in the presence and  
179 absence of CHS and the catalytically deficient mutant G8-G216D in the presence of CHS. The specific  
180 activity of WT in the absence of CHS is regarded as the basal ABCG5/G8 ATPase activity. **C**, Bar  
181 graphs represent percentage inhibition of ABCG5/G8 ATPase activity by 0.015mM orthovanadate, a  
182 P-value of <0.0001 obtained using ordinary one-way ANOVA (Prism 8).

183

184

185

186

187

188

189

190

191

192

193

194

195

196

197

198

199

200

201

**2.2. The lipid environments fine-tune ABCG5/G8 ATPase activity.** ABC transporters need to function in phospholipid-embedded environment. However, it is unknown whether the ABCG5/G8 function is controlled by phospholipids of specific headgroups or in specific lipid compositions. Because a high concentration of bile acids is required to activate ABCG5/G8 ATPase activity, attempts to use reconstituted proteoliposomes failed due to the immediate solubilization of the reconstituted proteins. To facilitate the assessment of mutant functions, we evaluated the lipid environments to obtain the most optimal assay conditions. To study the effect of lipid conditions and phospholipid species on the ABCG5/G8 function, we analyzed the CHS-coupled ATPase activity in the presence of two polar lipid extracts under a condition of fixed concentrations of sodium cholate and CHS (Materials and Methods). Using *E. coli* polar lipids, we carried out ATP concentration-dependent ATPase assay to determine the Michaelis-Menten kinetic parameters of CHS-stimulated ATP hydrolysis. We have observed the maximal ATP hydrolysis by ABCG5/G8 at concentrations slightly over 2.5 mM of ATP with a  $V_{max}$  of  $677.1 \pm 25.6$  nmol/min/mg, a  $K_M(ATP)$  of 0.60 mM, and a  $k_{cat}$  of  $1.69$  s<sup>-1</sup>. When using bovine liver polar lipids, we observed ~3.5-fold lower catalytic rate of ATP hydrolysis and ~50% higher  $K_M(ATP)$  (**Figure 4A & Table 1**). In the current study, polar lipids, cholate (bile acid) and CHS were all present in the reaction, indicating that the presence of *E. coli* polar lipids results in higher ATP association and consequently better stimulates ABCG5/G8 ATPase activity. When comparing the calculated values of  $k_{cat}$  and  $k_{cat}/K_M$ , we indeed observed an overall 5-fold higher turnover rate in the presence of *E. coli* polar lipids than liver polar lipids (**Table 1**).

202

203

204

205

206

To determine the dependence of phospholipid headgroups, we tested three most abundant phospholipids in either lipid extract on the ATP hydrolysis by ABCG5/G8, *i.e.*, phosphatidylethanolamine (PE), phosphatidylcholine (PC), and phosphatidylglycerol (PG) (see Materials and Methods). Preincubation with egg PE resulted in the highest specific activity, while the use of soy PC or egg PG only led to slightly higher ATP hydrolysis than the basal activity (**Figure**

207 4B). Interestingly, PE, the phospholipid found in both *E. coli* and liver lipids, is sufficient to stimulate  
 208 ATP hydrolysis in ABCG5/G8 to almost the highest specific activity, as reported here. In the  
 209 meantime, using PC or PG alone, the specific activity of ABCG5/G8 was also higher than that  
 210 obtained with the liver polar lipid mixture. These results suggest phospholipid headgroups in  
 211 regulating the ABCG5/G8 ATPase activity. Further investigations are necessary to pinpoint the effects  
 212 of individual types of phospholipids on the sterol transporter function.

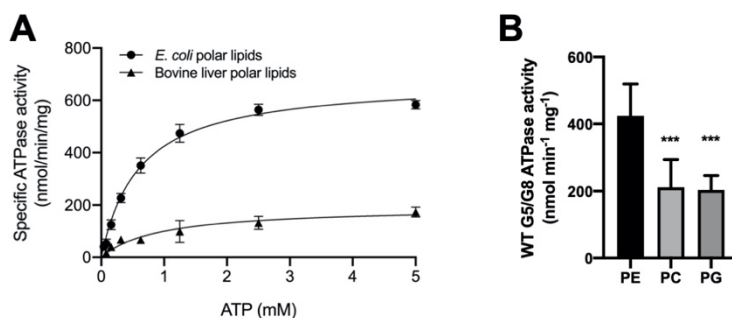

213  
 214 **Figure 4. Lipid dependence of ABCG5/G8 ATPase activity.**

215 **A**, Purified ABCG5/G8 was assayed in the presence of either *E. coli* or bovine liver polar lipids, and  
 216 the specific activities of ATP hydrolysis were obtained by the ATP concentration-dependent  
 217 experiments (0-5mM ATP). Both curves are fitted to the Michaelis-Menten equation (Prism 8), and  
 218 using two independently purified proteins, the means of at least three independent experiments  
 219 along with standard deviations are plotted here. The kinetic parameters are listed in Table 1. **B**, In a  
 220 condition of 5mM ATP and 4.1mM CHS, ATP hydrolysis of purified ABCG5/G8 was assayed in the  
 221 presence of egg PE, soy PC or egg PG, a P-value of 0.0006 and 0.0003, respectively, obtained using  
 222 ordinary one-way ANOVA (Prism 8).  
 223

224 **Table 1. Dependence of ABCG5/G8 ATPase Activity on ATP.**

|                                   | $V_{max}^a$<br>(nmol/min/mg) | $K_M$ (ATP)<br>(mM) | $k_{cat}^b$ (s <sup>-1</sup> ) | $k_{cat}/K_M$<br>(M <sup>-1</sup> s <sup>-1</sup> ) | $\Delta\Delta G_{MUT}^c$<br>(kJ/mol) | $n^e$ |
|-----------------------------------|------------------------------|---------------------|--------------------------------|-----------------------------------------------------|--------------------------------------|-------|
| WT (liver polar lipids)           | 192.8 ± 17.9                 | 0.93 ± 0.25         | 0.48 ± 0.04                    | 0.52x10 <sup>3</sup>                                | -                                    | 4     |
| WT ( <i>E. coli</i> polar lipids) | 677.1 ± 25.6                 | 0.60 ± 0.07         | 1.69 ± 0.06                    | 2.8x10 <sup>3</sup>                                 | -                                    | 6     |
| G5-E146Q <sup>d</sup>             | 167.1 ± 0.05                 | 0.51 ± 0.05         | 0.41 ± 0.00                    | 0.82x10 <sup>3</sup>                                | 11.7                                 | 5     |
| G8-R543S <sup>d</sup>             | 150.7 ± 3.7                  | 0.42 ± 0.04         | 0.38 ± 0.01                    | 0.90x10 <sup>3</sup>                                | 12.3                                 | 3     |
| G5-A540F <sup>d</sup>             | 101.2 ± 4.2                  | 0.58 ± 0.08         | 0.25 ± 0.01                    | 0.43x10 <sup>3</sup>                                | 15.8                                 | 5     |

225 **a**, Standard errors were calculated from the fits shown in Figures 3A & 5 using GraphPad Prism 8.

226 **b**, Turnover rates,  $k_{cat}$ , were calculated using the following formula.  $V_{max} = k_{cat} \times [E]$ , [E]: protein  
 227 concentration of ABCG5/G8 (363.1 nM).

228 **c**, Differential Gibbs free energy was calculated according to the formula:  $\Delta\Delta G_{MUT} = -RT \ln(k_{MUT}/k_{WT})$ ,  
 229  $k_{MUT}$ :  $k_{cat}$  of mutants,  $k_{WT}$ :  $k_{cat}$  of WT,  $R = 8.314 \text{ J mol}^{-1} \text{ K}^{-1}$  (R: Gas Constant, K: Kelvin),  $T = 310.15 \text{ K}$   
 230 (37°C).

231 **d**, Mutants were all assayed in the presence of *E. coli* polar lipids.

232 **e**, Number of independent experiments.  
 233

234 **2.3. Missense mutants impair CHS-coupled ATPase Activity of ABCG5/G8.** Using the CHS-coupled  
235 ATPase activity as the functional readout, we initiated studies in the catalytic mechanism of  
236 ABCG5/G8 by exploiting the transporter's missense mutations that undergo proper trafficking to  
237 post-ER cell membranes (ER-escaped mutants). In this study, we have used *Pichia pastoris* yeast and  
238 expressed recombinant proteins of G8-G216D, a catalytically deficient mutant [18], ABCG5<sup>E146Q</sup>/G8<sup>WT</sup>  
239 (G5-E146Q) and ABCG5<sup>WT</sup>/G8<sup>R543S</sup> (G8-R543S), two loss-of-function/sitosterolemia missense mutants  
240 [22,37], and ABCG5<sup>A540F</sup>/G8<sup>WT</sup> (G5-A540F), a loss-of-function mutant with putative sterol-binding  
241 defect [21] (**Figure 1B & Supplementary Figure 1**). The purified mutants were preincubated with *E.*  
242 *coli* polar lipids and sodium cholate as described above. As shown in **Figure 5**, when compared with  
243 WT, the sitosterolemia missense mutants, G5-E146Q and G8-R543S, show a ~80% reduction of the  
244 specific activity in CHS-coupled ATP hydrolysis ( $160 \pm 15$  nmol/min/mg and  $150 \pm 5$  nmol/min/mg,  
245 respectively). The sterol-binding mutant G5-A540F, when compared to WT, shows a ~90% reduction  
246 of the specific activity in CHS-coupled ATP hydrolysis ( $90 \pm 10$  nmol/min/mg). Similar levels of  
247 activity reduction were also observed for non-CHS-coupled ATP hydrolysis (**Supplementary Figure**  
248 **2**). We then performed ATP concentration-dependent experiments and analyzed the Michaelis-  
249 Menten kinetics for these three mutants. For all mutants,  $K_M(\text{ATP})$  remained nearly the same as  
250 compared to WT, but the mutants displayed a 40-60% reduction in the catalytic rate (**Table 1**). This  
251 result suggests that the mutants do not alter their ability of the nucleotide association, and other  
252 molecular events contribute to the reduction of the specific ATPase activity.

253 The effects of CHS on ABCG5/G8 WT and mutants were further investigated by measuring the  
254 ATP hydrolysis in the CHS concentration-dependent manner at a saturated ATP concentration (5mM  
255 here). Purified proteins were preincubated with *E. coli* polar lipids, sodium cholate and a wide range  
256 of CHS concentrations (0.064mM - 4.1mM). For WT, we obtained a  $V_{\max}$  of  $702.9 \pm 50.7$  nmol/min/mg,  
257 a  $K_M(\text{CHS})$  of 0.79 mM, and a  $k_{\text{cat}}$  of  $1.74 \text{ s}^{-1}$  (**Figure 6 & Table 2**). In the presence of *E. coli* polar lipids,  
258 the catalytic rates were similar between the CHS and ATP-dependent ATPase activities, a  $V_{\max}$  of ~700  
259 nmol/min/mg, which is about four times higher than that in the presence of liver polar lipids (**Tables**  
260 **1 & 2**) and more than two-fold higher than the previously reported value, ~290 nmol/min/mg [33].  
261 The catalytic rates of the mutants decreased by 70-90%, but except for G5-A540F, both G5-E146Q and  
262 G8-R543S displayed significantly larger  $K_M(\text{CHS})$ , up to two-fold increase. This suggests a more  
263 profound impact of sitosterolemia mutations on the ABCG5/G8 ATPase activity through sterol-  
264 protein interaction or structural changes.

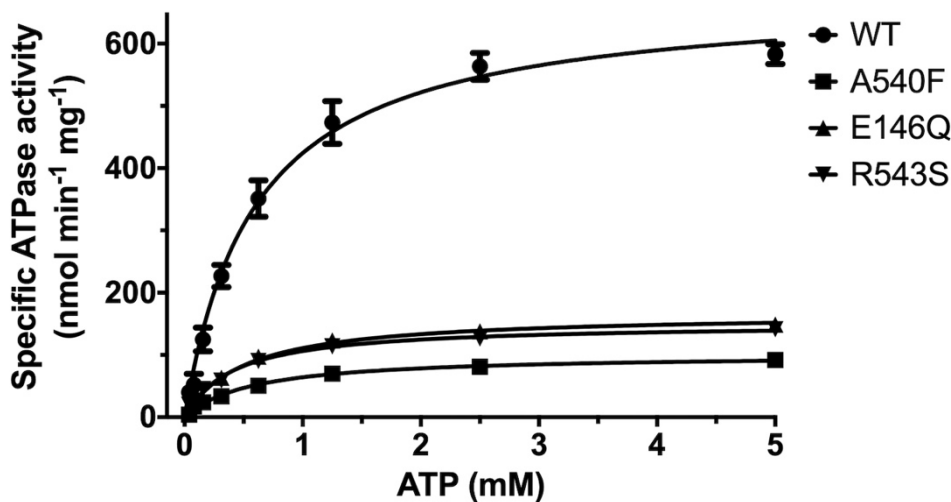

265

266

**Figure 5. ATP-Dependence of ABCG5/G8 ATPase Activity.**

267 Purified proteins were assayed in the presence of *E. coli* polar lipids, and the specific activities of ATP  
268 hydrolysis were obtained by the ATP concentration-dependent experiments (0-5mM ATP). The  
269 curves are fitted to the Michaelis-Menten equation (Prism 8), and using two-to-four independently



270 purified proteins, the means of at least three independent experiments along with standard  
 271 deviations are plotted here. The kinetic parameters are listed in Table 1.

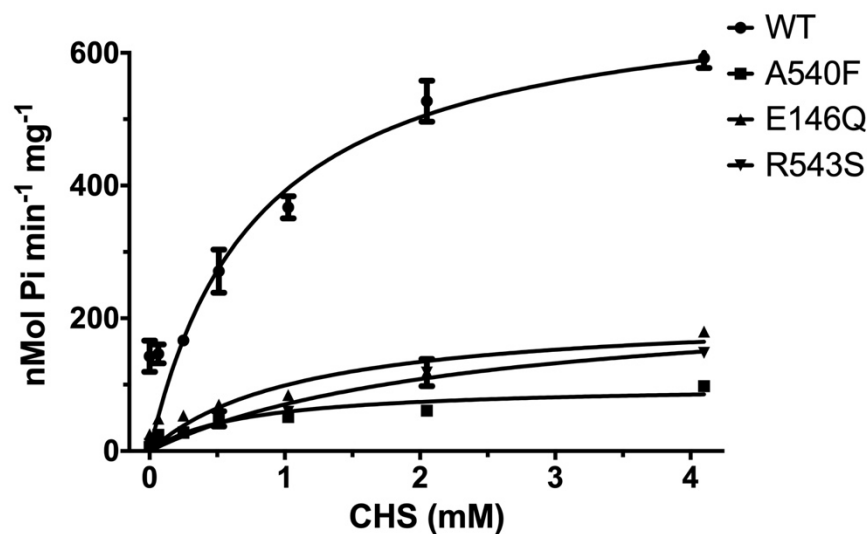

272

273

**Figure 6. CHS-Dependence of ABCG5/G8 ATPase Activity.**

274

275

276

277

278

279

280

281

**Table 2. Dependence of ABCG5/G8 ATPase Activity on Cholesteryl Hemisuccinate.**

|                       | $V_{max}^a$<br>(nmol/min/mg) | $K_M$ (CHS)<br>(mM) | $k_{cat}^b$ (s <sup>-1</sup> ) | $k_{cat}/K_M$<br>(M <sup>-1</sup> s <sup>-1</sup> ) | $\Delta\Delta G_{MUT}^c$<br>(kJ/mol) | $n^e$ |
|-----------------------|------------------------------|---------------------|--------------------------------|-----------------------------------------------------|--------------------------------------|-------|
| WT <sup>d</sup>       | 702.9 ± 50.7                 | 0.79 ± 0.17         | 1.74 ± 0.13                    | 2.2×10 <sup>3</sup>                                 | -                                    | 6     |
| G5-E146Q <sup>d</sup> | 210.0 ± 33.2                 | 1.13 ± 0.45         | 0.52 ± 0.08                    | 0.46×10 <sup>3</sup>                                | 10.0                                 | 2     |
| G8-R543S <sup>d</sup> | 237.1 ± 33.4                 | 2.38 ± 0.67         | 0.59 ± 0.08                    | 0.25×10 <sup>3</sup>                                | 9.0                                  | 2     |
| G5-A540F <sup>d</sup> | 99.8 ± 11.4                  | 0.70 ± 0.24         | 0.25 ± 0.03                    | 0.36×10 <sup>3</sup>                                | 16.1                                 | 4     |

282

**a**, Standard errors were calculated from the fits shown in Figure 6 using GraphPad Prism 8.

283

284

**b**, Turnover rates,  $k_{cat}$ , were calculated using the following formula.  $V_{max} = k_{cat} \times [E]$ , [E]: protein concentration of ABCG5/G8 (363.1 nM).

285

286

287

**c**, Differential Gibbs free energy was calculated according to the formula:  $\Delta\Delta G_{MUT} = -RT \ln(k_{MUT}/k_{WT})$ ,  $k_{MUT}$ :  $k_{cat}$  of mutants,  $k_{WT}$ :  $k_{cat}$  of WT,  $R = 8.314 \text{ J mol}^{-1} \text{ K}^{-1}$  (R: Gas Constant, K: Kelvin),  $T = 310.15 \text{ K}$  (37°C).

288

**d**, Both WT and mutants were assayed in the presence of *E. coli* polar lipids.

289

290

**e**, Number of independent experiments.

291 **2.4. Missense mutations cause conformational changes at the ATP-binding site.** To examine the  
292 relationship between structural changes of missense mutations and their impact on the ATPase  
293 activity, we have performed molecular dynamics (MD) simulations for the WT and three mutants in  
294 this study. We then analyzed the MD structures to understand how the mutations could lead to  
295 different conformation around the hypothetical surrounding residues at the nucleotide-binding sites  
296 (NBS). These residues were obtained through a structural comparison between the crystal structure  
297 of ABCG5/G8 (PDB ID: 5DO7) and a cryo-EM structure of ABCG2 (PDB ID: 6HBU) for which two  
298 ATP were bound in the homodimer [21,38].

299 To identify which residues are important for the ATP binding, we conducted MD simulations  
300 for the ABCG2 system. We calculated the ligand-residue MM-GBSA free energies ( $\Delta G_{\text{lig-res}}$ ) for the 32  
301 surrounding residues and identified eight hotspot residues which have  $\Delta G_{\text{lig-res}}$  better than -7.0  
302 kcal/mol (**Supplementary Table 1**). Although those hotspots were identified for ABCG2, it is  
303 reasonable to assume they are also hotspots for ABCG5/G8 given the apparent structural and  
304 sequence similarity (only one hotspot has different amino acid types). The root-mean-square  
305 deviation (RMSD) for the mainchain atoms is 2.60 Å, and the corresponding amino acid types of both  
306 proteins are listed in **Supplementary Table 1**. The detailed interactions between ATP and ABCG2  
307 revealed by a representative MD structure is shown in **Supplementary Figure 3**. In this study, we  
308 have focused on the active nucleotide-binding site (known as NBS2) in ABCG5/G8 [21] and analyzed  
309 residues 88-103, 246-251 of ABCG5 and 210-220, 237-245 of ABCG8. Those residues were recognized  
310 as the surrounding residues of the NBS2 in ABCG5/G8.

311 As shown in **Figure 7**, the mutations at the three sites can lead to global changes on the overall  
312 ABCG5/G8 structure, with RMSD values larger than 2.0 Å. The difference between the RMSDs of the  
313 secondary structures is smaller, probably because more obvious changes need longer simulation time  
314 to manifest. We are especially interested in the mutational effect on the ATP-binding site and  
315 generated The RMSD *vs.* Simulation Time curves for those hypothetic surrounding residues  
316 (**Supplementary Figure 4**). We observed that the RMSDs with and without least-square (LS) fitting  
317 are very stable for the WT, whereas for G5-E146Q and G5-A540F, both the LS Fitting and No-Fitting  
318 RMSD are significantly larger. However, G8-R543S mutation did not lead to significantly larger  
319 RMSD. This is because the distance between the mutation site and ATP binding site is far away and  
320 much long MD simulations are required. Indeed, the RMSD has a trend of getting large along the MD  
321 simulation time for G8-R543S (**Supplementary Figure 4D**). We then conducted correlation analysis  
322 using an internal program to identify possible interaction pathways between the two sites. As shown  
323 in **Supplementary Figure 5**, the shortest path contains R543, E474, N155, V205 and L213. L213 is  
324 linked to four key residues for ATP binding. It is understandable that a perturbation at R543 needs  
325 long simulation time to reach the ATP binding site, given the shortest interaction path contains six  
326 residues including two ends. Overall, we observed a significant perturbation on the conformations  
327 of the putative surrounding residues due to the mutations at G5-E146Q and G5-A540F. We  
328 anticipated that G8-R543S mutation could lead to a significant conformational change at NBS2 in  
329 much longer MD simulations.

330 Next, we identified representative MD conformations for all four ABCG5/G8 protein systems for  
331 comparison (**Figure 8**). It is observed that the hotspot residues are overlaid very well between the  
332 crystal and MD structures for the WT (**Figure 8E**) and R543S mutant except for R211, while for the  
333 other two mutants, the RMSDs are significantly larger. This observation is expected, and the reason  
334 was explained above. Interestingly, the side chain of R211 underwent dramatically change for all four  
335 protein systems during MD simulations. If R211 is omitted, the mainchain RMSDs become much  
336 smaller. In summary, the conformational changes from our molecular modeling can qualitatively  
337 explain why the three mutations can lead to impaired ATPase activity. Of particular note, G5-K92,  
338 the hotspot residue that has the strongest interaction with ATP, is a part of the Walker A motif at the  
339 active nucleotide-binding site and required for ABCG5/G8 functions [18,33].

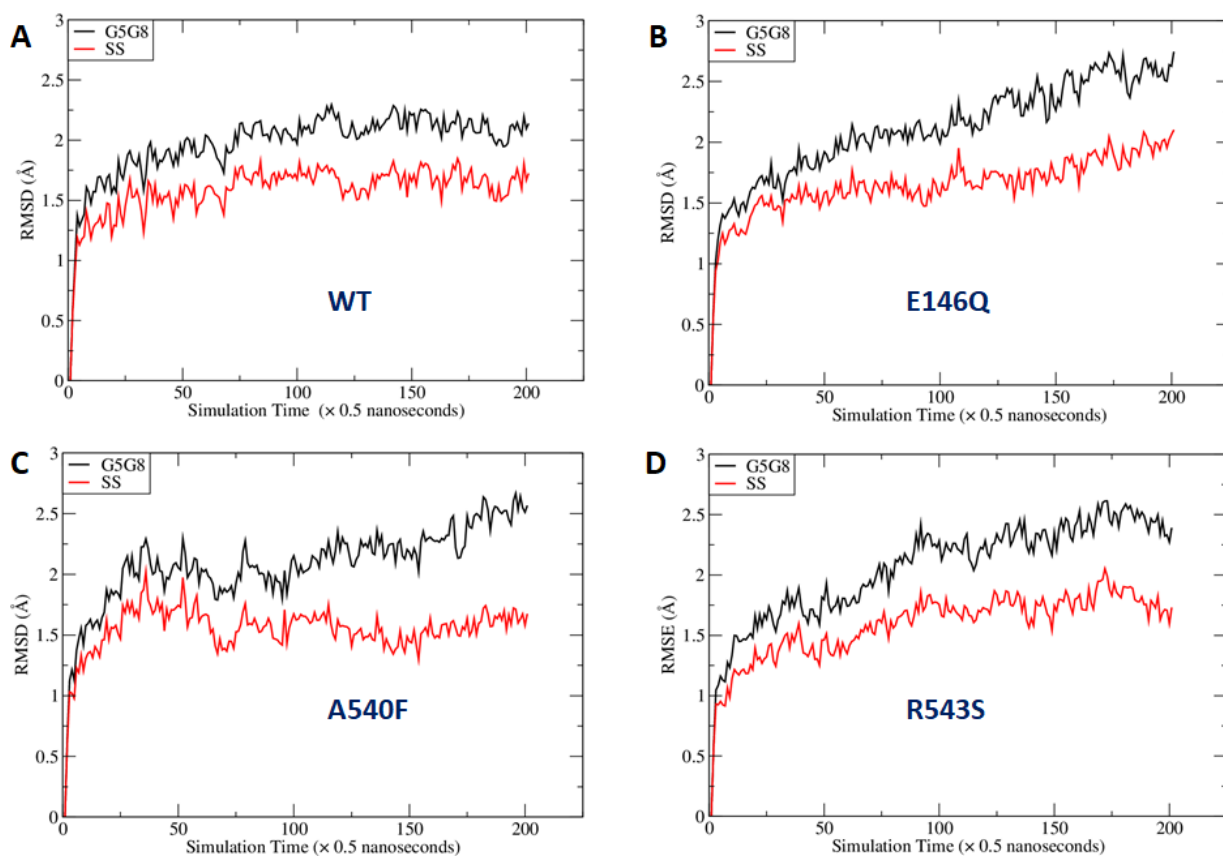

340

341 **Figure 7. Fluctuation of Root-mean-square deviations (RMSD) along MD simulation time course.**

342 RMSD were calculated using the main chain atoms of all residues (black lines) or secondary structures

343 only (red lines). A: wild type, B: E146Q mutant in ABCG5, C: A540F mutant in ABCG5, and D: R543S

344 mutant in ABCG8. G5G8: ABCG5/G8; SS: secondary structure.

345

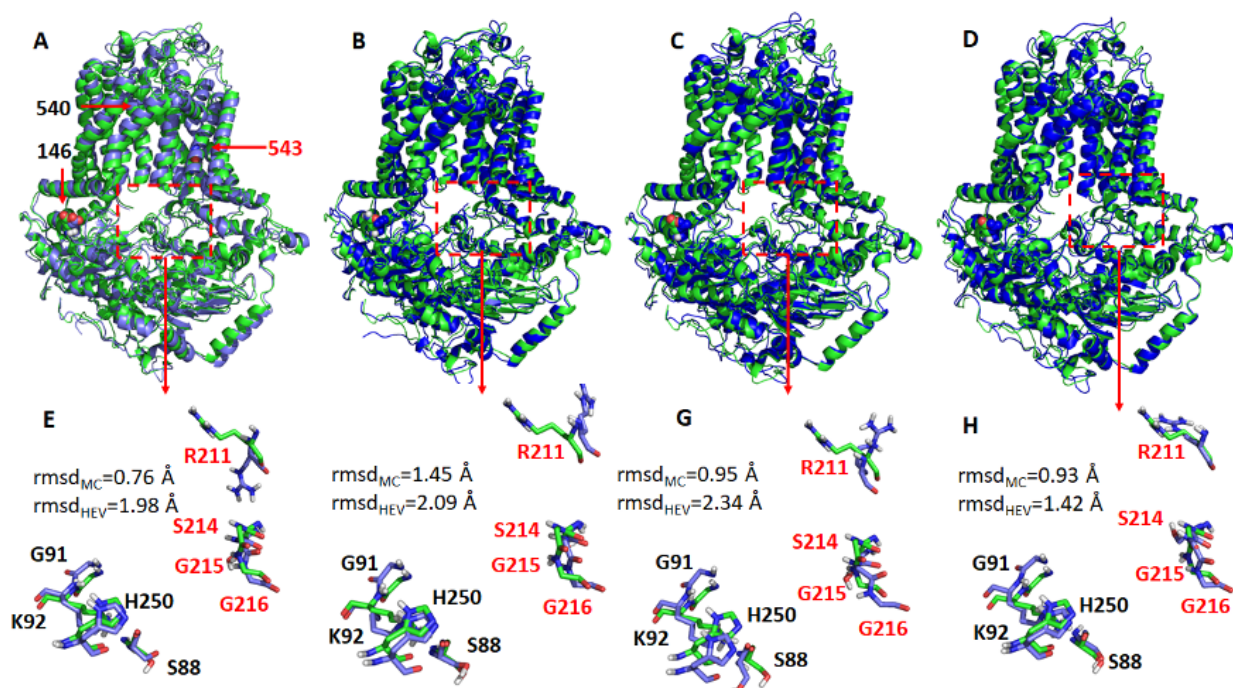

346

347 **Figure 8. Representative structures of the WT ABCG5/G8 and its three missense mutants.**

348 The representative structures (shown as blue cartoons and bluish sticks) were aligned to the crystal

349 structure (green cartoons, and greenish lines). The three mutation residues, E146Q, A540F and R543S,

350 are shown as spheres. The hypothetical surrounding residues of ATP are shown as dashed rectangles.  
351 A and E: wild type, B and F: E146Q, C and F: A540F, D and G: R543S. G5: ABCG5; G8: ABCG8.  
352 Residues in G5 and G8 are separately colored in black and red. Root-mean-square deviations  
353 (RMSDs) for the mainchain atoms ( $\text{rmsd}_{\text{MC}}$ ) and all heavy atoms ( $\text{rmsd}_{\text{HEV}}$ ) were shown in the lower  
354 panels. If R211 is omitted from RMSD calculations, rmsds of the mainchain atoms are 0.69, 1.30, 0.88  
355 and 0.78 Å for WT, E146Q, A540 and R543S, respectively; the corresponding rmsds of heavy atoms  
356 are 0.85, 1.42, 1.13 and 0.96 Å.  
357

### 358 3. Discussion

359 In this study, we have shown that CHS stimulates the ATPase activity of the human ABCG5/G8  
360 sterol transporter to a much higher specific activity, as compared to previously reported data. (**Tables**  
361 **1 & 2**). The much increased CHS-coupled ATPase activity indicates that ABCG5/G8 may need such  
362 a high ATP catalytic rate to achieve the sterol-transport function across the cellular membranes. CHS  
363 is a relatively water-soluble cholesterol analog and is used to mimic cholesterol in membrane protein  
364 crystallization [21,39]. Our results showing CHS-stimulated ATPase activity suggest that the sterol  
365 molecules may have played a role in promoting an active conformation for the ATPase and/or  
366 enhancing the stability of ABCG5/G8. This idea of protein stability is supported by recent findings  
367 showing that CHS stabilizes a variety of human membrane proteins towards active conformations  
368 [40]. In the crystallographic study, >2% cholesterol was necessary to produce crystals capable of  
369 diffracting X-ray to better than 4 Å, and several sterol-like electron densities were suspected on the  
370 crystal structure of ABCG5/G8 [21]. Building upon previous work using bile acids [33] and  
371 androstane [32], our enzymatic results should come with no surprise that the WT ABCG5/G8  
372 functionality and its active conformation are directly coupled with cholesterol analogs.

373  
374 For ABCG5/G8-mediated ATP catalysis, we observed similar catalytic rates from the CHS and  
375 ATP concentration-dependent experiments, a  $V_{max}$  of ~700 nmol/min/mg, whereas the  $K_M$  values are  
376 very similar to each other,  $K_M(\text{ATP}) = 0.60$  mM and  $K_M(\text{CHS}) = 0.79$  mM (**Tables 1 & 2**).  $K_M(\text{ATP})$  and  
377  $K_M(\text{CHS})$  can be used to implicate ATP and sterol association to the transporters during the ATP  
378 catalytic process, respectively. We therefore speculate that one ATP usage is required for sterol-  
379 protein association for one CHS (or cholesterol) molecule. Because ABCG5/G8 is believed to contain  
380 only one active NBS [18], such 1:1 stoichiometry of ATP and cholesterol for ABCG5/G8 may reflect  
381 the sterol transport rate by the single active site on this ABC transporter. An *in vitro* sterol-binding or  
382 transport assay, in need to develop, will be necessary to directly address such relationship. In  
383 addition to sterols, it is intriguing that PE, PC, or PG alone was sufficient to support ATPase activity  
384 of ABCG5/G8, with PE-driven activity the highest (**Figure 4**). PE is the major phospholipid of the *E.*  
385 *coli* polar lipids, ~60%, and the second abundant phospholipid in the bile canalicular membranes and  
386 the small intestine brush-border membranes, ~25% and ~40% respectively of total phospholipids  
387 [41,42]. It has been shown that PE preferentially fits the headgroup-binding sites on integral  
388 membrane proteins [43]; thus, PE may be recruited as better phospholipids to support ABCG5/G8  
389 function in the cell membranes. The approximate ratio of lipids for either *E. coli* or liver polar lipids  
390 may contribute to the apparent difference in activity, but it remains unknown how phospholipid  
391 composition regulates the transporter function. It is worth noting that specific phospholipids were  
392 shown to regulate the ATPase activity of other ABC sterol transporters, such as sphingomyelin,  
393 although the mechanistic detail is not clear [19]. These individual lipids will be subjected to further  
394 examination to define the phospholipid specificity on the ABCG5/G8 ATPase activity and/or sterol  
395 transport function.

396  
397 By mapping disease-carrying residues on the apo structure of ABCG5/G8, we have found that  
398 most missense variants occur within or near the structural motifs consisting of several conserved  
399 amino acids [22]. Several missense mutations (ER-trapped) prevent protein maturation from the  
400 endoplasmic reticulum (ER), but at least five mutations (ER-escaped) have been shown to undergo  
401 proper trafficking to post-ER cell membranes [29]. So far, no report has shown the impact of these  
402 ER-escaped missense mutants on ABCG5/G8 function using either *in vitro* or *in vivo* models. In this  
403 study, we have used purified proteins from *Pichia pastoris* to investigate the functional activity of  
404 ABCG5/G8 *in vitro* and aimed to establish the mechanistic basis of ABCG5/G8 through analyzing the  
405 structure-function relationship of its loss-of-function missense mutations. The sitosterolemia  
406 missense mutants G5-E146Q and G8-R543S have shown a reduction of CHS-coupled ATP hydrolysis,  
407 but retained ~20% activity as compared to WT, while the putative sterol-binding mutant G5-A540F  
408 has shown further reduction to ~10% of WT ATPase activity (**Figures 5 & 6**). With such activity

409 reduction, the mutant proteins maintained the ATPase activity similar to the basal level, as shown by  
410 WT, suggesting a remote and allosteric regulation to keep ATPase active during the reaction.

411

412 It is not uncommon that reagents such as CHS may be used as protein stabilizers for disease-  
413 causing missense variants. Here, in the absence of CHS-coupled stimulation, the mutants showed  
414 similar level of reduced ATPase activity, arguing a more profound effect from impaired allosteric  
415 regulation on the catalytic activity of the mutants, rather than CHS-driven stability for mutant  
416 proteins. As predicted by MD simulation, the ATP-bound homology model underwent global  
417 conformational changes upon introducing the mutations (**Figure 7**). These mutations, albeit relatively  
418 far away from the nucleotide-binding site, can cause significant structural rearrangement of the  
419 residues within the region that encompass the active NBS2 (**Figure 8**). Such conformational changes  
420 may alter responses to sterol-protein interaction necessary for maximal ATPase activity.

421

422 In the atomic model of ABCG5/G8 (PDB ID: 5D07), G5-E146 is located on the hot-spot helix of  
423 the triple-helical bundle and in proximity to ABCG5's polar relay, while G8-R543 is part of ABCG8's  
424 polar relay in the core of TMD (**Figure 1**). Both triple-helical bundle and polar relay are believed to  
425 form a network of hydrogen bonding and salt bridges and play an important role in inter-domain  
426 communication during the transporter function [21]. G5-E146 and G8-R543 are found in the  
427 proximity of the hydrogen-bond distance with Arginine 377 of ABCG5 (G5-R377) and Glutamate 503  
428 of ABCG8 (G8-503), respectively (**Figure 1B**). Based on the ATP-dependent experiments (**Figure 5 &**  
429 **Table 1**), we obtained the changes of Gibbs free energy from WT to each mutant ( $\Delta\Delta G_{MUT}$ ) as  $\Delta\Delta G_{E146Q}$   
430 =  $\sim 11.7$  kJ/mol and  $\Delta\Delta G_{R543S}$  =  $\sim 12.3$  kJ/mol. Such energetic loss is in the range of intramolecular  
431 hydrogen-bonding potential observed on transmembrane  $\alpha$ -helical bundles [44]. Therefore, the  
432 results support the hypothesis that the hot-spot helix and the polar relay are responsible for  
433 transmitting signals between NBD and TMD. Slightly lower  $\Delta\Delta G_{MUT}$  was observed from CHS-  
434 dependent experiments (**Figure 6 & Table 2**),  $\Delta\Delta G_{E146Q}$  =  $\sim 10.0$  kcal/mol and  $\Delta\Delta G_{R543S}$  =  $\sim 9.0$  kcal/mol.  
435 This falls in the range of hydrophobic interaction and argues weakened sterol-transporter interaction  
436 due to these disease mutations. As for the sterol-binding mutant, we obtained higher energetic loss,  
437 but similar  $\Delta\Delta G_{MUT}$  from ATP- or CHS-dependent analysis,  $\Delta\Delta G_{A540F}$  =  $\sim 15.8$  or  $\sim 16.1$  kJ/mol,  
438 respectively. This likely indicates a strong hydrophobic interaction between sterols and the  
439 transporter, as no obvious hydrogen donors/acceptors can be found at the putative sterol-binding  
440 site on the crystal structure. In addition, G5-A540 is distant from the polar relay ( $>10\text{\AA}$  away); thus,  
441 this data suggests a remote contact by sterol molecules to control the sterol-coupled signaling, likely  
442 through the polar relay in the transmembrane domains. In the ATP concentration-dependent  
443 experiments, the  $K_M$  values for ATP remained almost the same (**Table 1**), suggesting that ATP binding  
444 was not affected by these mutants. The  $K_M$  values for CHS was significantly increased in the disease  
445 mutants, but not the sterol-binding mutant (**Table 2**), suggesting that CHS interacts with ABCG5/G8  
446 and remotely regulates the turnover of ATP hydrolysis in either sequential (Mode 1) or concerted  
447 (Mode 2) pathway (**Figure 9**). Collectively, these results argue that a working network of hot-spot  
448 helix and polar relay is essential to maintain the communication between ATPase and sterol-binding  
449 activities in ABCG5/G8, which are impaired by the loss-of-function missense mutations. As G8-R532S  
450 is the only known ER-escaped disease mutant, we will expect more insight in such polar relay-driven  
451 allosteric regulation by investigating other polar relay residues with site-directed mutagenesis.

452

453 In conclusion, these studies show that CHS stimulates ABCG5/G8 ATPase activity and may  
454 promote an active conformation for ABCG5/G8-mediated sterol transport. The enzymatic  
455 characterization of three loss-of-function missense variants provides a mechanistic basis of how the  
456 polar relay contributes to the inter-domain communication for the sterol-coupled ATPase activity in  
457 ABCG5/G8 and may be directly involved in such ligand-protein interactions. Further studies will  
458 reveal more insight into these molecular events and enable sterol-lowering therapeutics to treat  
459 sitosterolemia and hypercholesterolemia.

460

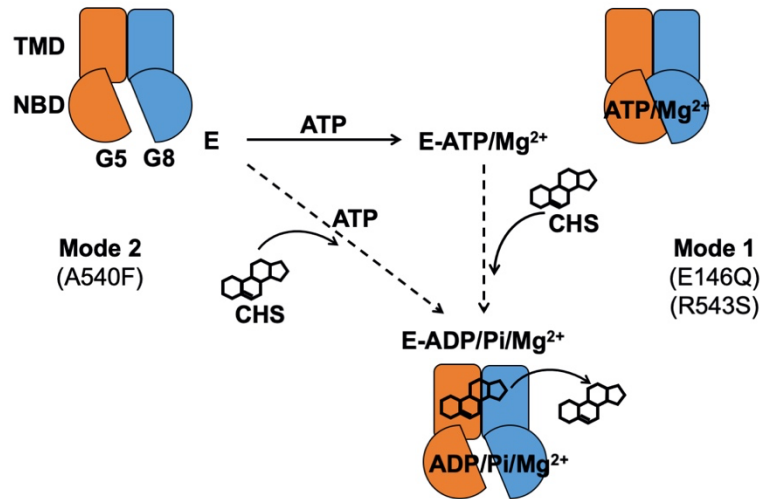

461  
462  
463  
464  
465  
466  
467  
468  
469  
470  
471  
472

**Figure 9. Proposed mechanism of sterol-coupled ATP catalysis by ABCG5/G8.**

(Mode 1) A sequential pathway is derived from experiments on the disease mutants, G5-E146Q and G8-R543S. ABCG5/G8 first recruits ATP and Mg<sup>2+</sup> ions, likely causing a conformational change of the NBD for ATP binding. CHS/sterol then binds the transporter and triggers ATP hydrolysis that may result in its dissociation. (Mode 2) A concerted pathway is derived from experiments on the putative sterol-binding mutant, G5-A540F. ABCG5/G8 simultaneously recruits CHS, ATP, and Mg<sup>2+</sup> ions, induces a transient conformational change of the NBD, and activates ATP hydrolysis and CHS/sterol dissociation from the transporter. G5: ABCG5; G8: ABCG8; E: ABCG5/G8 heterodimer; Pi: inorganic phosphate.

## 473 4. Materials and Methods

474 **4.1. Materials.** *E. coli* polar lipids (Cat. #: 100600C) and bovine liver polar lipids (Cat. #: 181108C) were  
475 from Avanti Polar Lipids, Inc. (via MilliporeSigma). Cholesterol, cholesteryl hemisuccinate (CHS),  
476 and n-Dodecyl  $\beta$ -D-maltopyranoside (DDM) were from Anatrace. The Ni-NTA agarose resin was  
477 from Qiagen, the calmodulin (CBP) affinity resin, zeocin, and ampicillin were from Agilent.  
478 Imidazole,  $\epsilon$ -aminocaproic acid, sucrose, yeast extract, tryptone, peptone, yeast nitrogen base (YNB),  
479 and ammonium sulfate were obtained from Wisent. ATP disodium trihydrate, Tris-(2-carboxyethyl)-  
480 phosphine (TCEP), sodium chloride, glycerol, ethylene diamine-tetraacetic acid (EDTA), ethylene  
481 glycol-bis( $\beta$ -aminoethyl ether)-N,N,N',N'-tetraacetic acid (EGTA), sodium dodecyl sulfate (SDS),  
482 Ponceau S solution, sodium azide, Bradford reagents, Tween 20, magnesium chloride, calcium  
483 chloride, and all protease inhibitors were obtained from Bioshop Canada. Biotin, sodium cholate  
484 hydrate, L-ascorbic acid, ammonium molybdate, bismuth citrate, sodium citrate, methanol,  
485 ammonium hydroxide, hydrochloric acid, and acetic acid were obtained from MilliporeSigma.  
486 Dithiothreitol (DTT), Tris base and Tris acetate were obtained from ThermoFisher. Clarity Western  
487 ECL substrates, 30 % acrylamide, agarose and ammonium persulfates were obtained from Bio-Rad.  
488 Restriction enzymes were obtained from New England Biolabs, Promega and ThermoFisher. YPD:  
489 Yeast extract Peptone Dextrose; YPDS: Yeast extract Peptone Dextrose Sorbitol; MGY: Minimal  
490 Glycerol Yeast nitrogen base; mPIB (minimal protease inhibitor buffer for yeast cell lysis): 0.33 M  
491 sucrose, 0.3 M Tris-HCl (pH 7.5), 1 mM EDTA, 1mM EGTA, and 100mM  $\epsilon$ -aminocaproic acid, ddH<sub>2</sub>O  
492 to a final volume of 1 L and stored at 4°C.

493  
494 **4.2. Cloning of ABCG5/G8 missense mutants.** The expression vectors (pLIC and pSGP18), carrying  
495 human ABCG5 (NCBI accession number NM\_022436) and human ABCG8 (NCBI accession number  
496 NM\_022437), were derived from pPICZB (Invitrogen) as described [33,45], pLIC-ABCG5 and  
497 pSGP18-ABCG8, respectively. A tandem array of six histidines separated by glycine (His<sub>6</sub>GlyHis<sub>6</sub>)  
498 was added to the C terminus of ABCG5, and A tag encoding a rhinovirus 3C protease site followed  
499 by a calmodulin binding peptide (CBP) was added to the C terminus of ABCG8. To generate the  
500 missense mutants in this study, we performed site-directed mutagenesis by using WT ABCG5 or  
501 ABCG8 as the templates and the following codon-optimized oligonucleotide primers (Eurofins  
502 Genomics Canada). G5-A540F: CCATTTTTGGGGTGCTTGTGGATCTGGATTCCTCAG (forward)  
503 and GCACCCCAAAAATGGACAGCAGAGCCACTACAC (reverse); G5-E146Q:  
504 GCGCCAAACGCTGCACTACACCGCGCTGC (forward) and  
505 CAGCGTTTGGCGCACGGTGAGGCTGCTCAG (reverse); G8-R543S:  
506 GTTGCTCTATTATGGCCCTGGCCGCCGC (forward) and  
507 GCCATAATAGAGCAACAGAAGACCACCAGCCAC (reverse); G8-G216D:  
508 ACGAGCGCAGGAGAGTCAGCATTGGGGTGCAG (forward) and  
509 CTCTCCTGCGCTCGTCCCCGACAACCCC (reverse). The polymerase chain reaction (PCR)  
510 included 1-unit Phusion High-Fidelity DNA Polymerase (New England Biolabs), 1x Phusion buffer,  
511 200 mM dNTP, 2% (v/v) DMSO, 100 ng DNA templates, and 0.4 mM forward and reverse primers.  
512 Each mutant-containing plasmid was amplified by the following PCR setting: initial DNA  
513 denaturation (98°C, 2 minutes), followed by 30 cycles of denaturation (98°C, 15 seconds) / primer  
514 annealing (55°C, 30 seconds) / DNA extension (72°C, 3 minutes), then final extension (72°C, 20  
515 minutes). 5 $\mu$ l of the PCR products was run on a 1% agarose gel to confirm the amplification, and 1 $\mu$ l  
516 of Dnp1 restriction enzymes (20 units) was used to digest the WT templates overnight at 37°C to. The  
517 modified plasmids were cleaned up by ethanol acetate precipitation technique. 5 $\mu$ l of 3M Sodium  
518 acetate was added to each 50 $\mu$ l PCR product. 200 $\mu$ l of 100% Ethanol was added to each tube,  
519 vortexed, and left at room temperature for 10 minutes. At max speed in a table centrifuge for 10  
520 minute the plasmids were pelleted the supernatant was removed then washed by 75% ethanol.  
521 Residual ethanol was dried by a Speed-Vac at the maximal speed for 20 minutes at room temperature.  
522 The pellet was resuspended in ddH<sub>2</sub>O. Mutants plasmids were cloned into XL1-Blue competent *E.*  
523 *coli* cells by the heat-shock approach as described in the supplier's manual (Novagen/Agilent) and by  
524 antibiotic selection using Zeocin (Invitrogen/ThermoFisher). Using PureYield Plasmid Midiprep kit



525 (Promega), DNA preparations of selected clones were subjected to sequencing at Eurofins Genomics  
526 Canada.

527

528 **4.3. Expression of ABCG5/G8 missense mutants in *Pichia pastoris* yeast (Supplementary Figure**  
529 **1A).** Both WT and mutant plasmids (20 mg each plasmid) were linearized using PmeI and co-  
530 transformed into the *Pichia* strain KM71H by electroporation. Immediately the cells were  
531 resuspended with 1-mL ice cold 1M sorbitol and incubated at 30°C for 1 hour. Then 5mL fresh YPD  
532 were added and incubated for 6 hours at 250 rpm and 30°C. The cells were then centrifuged at 3000xg  
533 for 10 minutes and resuspended with 200µL of YPD. 100 µL of transformants were plated on YPDS  
534 plates containing 100 (low), 500 (medium) or 1000 (high) µg/mL of Zeocin to screen for successful  
535 transformation. Seven colonies were picked and grown in 10 mL of MGY media for 24 hours in sterile  
536 50 mL tubes at 250 rpm and 30°C. The cells were centrifuged for 10 minutes at 3000xg and the  
537 resuspended with 10 mL of MM media. 50 µL methanol was added to the media and once again after  
538 12 hours. The cells were harvested after 24-hour incubation at 250 rpm and 30°C, resuspended in 600  
539 µL mPIB buffer transferred into 1.5 mL Eppendorf tube. After adding 500 µL glass bead, protease  
540 inhibitors, and 10mM DTT, the cells were lysed using a mini-bead beater (Biospec), 1.5 minutes  
541 beating and 1.5 minutes rest on ice for 3 cycles. The unbroken cells and beads were pelleted by  
542 centrifugation at 5000×g for 5 minutes at 4°C, followed by 21130xg for 5 minutes at 4°C. The  
543 supernatant was collected, and the concentration of the total proteins was estimated by Bradford  
544 assay. 1 µl of cell lysate alongside a 0 µg to 10 µg BSA standards were each added to a 200 µl Bradford  
545 reagent on a 96-well plate. Absorbance at 595 nm was used to measure the protein concentrations  
546 using a Synergy H1 Hybrid reader. The cell lysates (20 or 30 µg of total proteins) was resolved by  
547 SDS-PAGE, and protein expression was analyzed by immunoblotting using monoclonal anti-RGSH4  
548 antibodies (Qiagen) to detect ABCG5 and polyclonal anti-hABCG8 antibodies (Novus Biologicals) to  
549 detect ABCG8. The clones expressing the highest level for both subunits were selected and stored in  
550 20% glycerol at -75°C.

551

552 **4.4. Cell culture and microsomal membrane preparation.** The conditions for cell growth and WT  
553 protein induction were as described (14). Briefly, cells were initially grown at 30°C to accumulate cell  
554 mass in an Innova R43 shaker (Eppendorf) at 250 rpm for 24-48 hours with the pH maintained at pH  
555 5-6. To induce protein expression, cells were left fasting for 6-12 hours, then incubated with 0.1% (v/v)  
556 methanol for 6–12 hours at 20 or 28°C. The methanol concentration was increased to 0.5% (v/v) by  
557 adding methanol every 12 hours for 48-60 hours. Cell pellets were collected and resuspended in mPIB  
558 and stored at -75°C. Approximately 45 ± 10 g of cell mass was typically obtained from 1 L of cultured  
559 cells. The frozen cells were thawed and lysed using a C3-Emulsifier (Avestin) in mPIB in the presence  
560 of 10 mM DTT and protease inhibitors (1 µg/ml leupeptin, 1 µg/ml pepstatin A, 1 µg/ml aprotinin,  
561 and 2 mM PMSF). The microsomal membranes were then prepared, as described [21].

562

563 **4.5. Purification of ABCG5/G8 and its mutants.** Both WT and mutants were purified following a  
564 protocol as described previously [21], with minor modification. Briefly, DDM-solubilized membranes  
565 were subjected to a tandem affinity column chromatography, first using Ni-NTA and then CBP. The  
566 N-linked glycans and the CBP tag remained on the purified heterodimers, and the CBP eluates were  
567 further purified by gel-filtration chromatography using a Superdex 200 Increase 10/300 GL column  
568 on an ÄKTA Pure purification system (Cytiva, formerly GE Healthcare Life Sciences). The proteins in  
569 the peak fractions were collected and concentrated to 1-3 mg/mL for storage at -75°C. Noticeably, the  
570 final yield for mutants was lower than WT, in a range of 400-800µg per six liters of cells. The  
571 expression level of the mutant proteins in the microsomes and their solubility was slightly lower than  
572 WT. Some proteins were also lost during Ni-NTA binding and imidazole wash. The profile of the gel-  
573 filtration chromatography often showed a higher peak at the void volume than dimeric proteins.  
574 These factors collectively suggest that the mutant proteins are more prone to aggregation, and thus  
575 explain the lower yields.

576 **4.6. ATPase assay.** We have consistently observed a strong cloudiness in the assay solution when  
577 using previous protocols, consequently resulting in low sensitivity of detecting the ABCG5/G8  
578 ATPase activity. Because a high concentration of bile acids is required, we have reasoned that the  
579 high content of detergents, both in the assay solution and in the protein preparations, may have  
580 caused either high background upon quenching the reaction in the Malachite Green-based assay [33]  
581 or poor organic-aqueous phase separation [21]. The measurement of ATPase activity has thus become  
582 inconsistent from one protein preparation to another. To overcome this issue, we first optimized the  
583 ATPase assay by adopting a colorimetric and bismuth citrate-based approach [35], which also allows  
584 high-throughput detection of the liberated inorganic phosphate by a microplate reader. The ATPase  
585 assay was performed in a 65 $\mu$ l final reaction volume containing 2mg/ml *E. coli* or liver polar lipids or  
586 designated phospholipids, 1.5% sodium cholate, 0.2% (4.11mM) CHS, and 2mM DTT in Buffer A  
587 (50mM Tris/Cl pH 7.5, 100mM NaCl, 10% glycerol, 0.1% DDM). The Lipid/CHS/DTT mixture was  
588 thoroughly sonicated and preincubated with ABCG5/G8 proteins (0.3 to 1.5  $\mu$ g) for 5 minutes at room  
589 temperature. The catalytically deficient G8-G216D was used as the negative control.  
590

591 The enzymatic activity of ABCG5/G8 was initiated upon the addition of the 10X ATP cocktail  
592 (6.5 $\mu$ l) and incubated at 37°C. Aliquots (8.5 $\mu$ l) were removed every 2 minutes and added to the pre-  
593 chilled quencher wells to stop the reaction. The quencher solution was made of 5% SDS in 5mM HCl,  
594 which together with smaller reaction volume, contributed to significant reduction of cloudiness for  
595 inorganic phosphate detection. Lipid mixtures were prepared at 30mg/ml (~20mM) in Buffer A  
596 containing 7% sodium cholate. CHS stock solution (1%, w/v) was prepared in a Buffer A and 4.5%  
597 sodium cholate. 10X Mg/ATP cocktail contains 50mM ATP, 75mM MgCl<sub>2</sub>, 100mM NaN<sub>3</sub> in a buffer  
598 containing 50mM Tris/Cl pH 7.5. To detect the liberated inorganic phosphate, 50 $\mu$ L of freshly-made  
599 Solution II (142mM ascorbic acid, 0.42M HCl, 4.2% Solution I (10% ammonium molybdate) was  
600 added to plate wells and left on ice for 10 minutes. Then 75 $\mu$ l Solution III (88mM bismuth citrate,  
601 120mM sodium citrate, 1M HCl) was added to plate wells and placed at 37°C for 10 minutes. The  
602 absorbance was measured at 695nm using a multi-well plate reader. For the phosphate standards,  
603 1M monobasic or dibasic sodium or potassium phosphate in 50mM Tris/Cl pH 7.5 was prepared, and  
604 six standard inorganic phosphate solutions (0 $\mu$ M, 12.5 $\mu$ M, 25 $\mu$ M, 50 $\mu$ M, 100 $\mu$ M, 200 $\mu$ M) were used  
605 in every experiment. The linear range of each reaction was used to calculate the initial rate of ATP  
606 hydrolysis. GraphPad Prism 8 was used to perform nonlinear regression and ordinary one-way  
607 ANOVA, with a P value of  $\leq 0.05$  considered significant from at least three independent experiments.  
608 The kinetic parameters were calculated by nonlinear Michaelis-Menten curve fitting using GraphPad  
609 Prism 8.  
610

611 **4.7. Computational Methods.** We studied four ABCG5/G8 protein systems including the WT, E146Q,  
612 A540F and R543S mutants. Each MD system consists of one copy of ABCG5/G8 heterodimer, 320 1,2-  
613 Dimyristoyl-sn-glycero-3-phosphocholine (DMPC) lipid, 16 Cholesterol, 43,621 TIP3P [46] water  
614 molecules, 103 Cl<sup>-</sup> and 83 Na<sup>+</sup> to neutralize the MD systems. AMBER ff14SB [47], Lipid14 [48] and  
615 GAFF [49] force fields were used to model proteins, DMPC lipids and Cholesterols, respectively. The  
616 residue topology of cholesterol was prepared using the Antechamber module [48]. MD simulation  
617 was performed to produce isothermal-isobaric ensembles using the pmemd.cuda program in  
618 AMBER 18 [50]. The Particle Mesh Ewald (PME) method [51] was used to accurately calculate the  
619 electrostatic energies with the long-ranged correction taken into account. All bonds were constrained  
620 using the SHAKE algorithm [52] in both the minimization and MD simulation stages following a  
621 computational protocol described in our previous publication [21]. Briefly, there were three stages in  
622 a series of constant pressure and temperature MD simulations, including the relaxation phase, the  
623 equilibrium phase, and the sampling phase. In the relaxation phase, the simulation system was  
624 heated up progressively from 50K to 250K at steps of 50K and 1-nanosecond MD simulation was run  
625 at each temperature. In the next equilibrium phase, the system was equilibrated at 298K, 1 bar for 10  
626 ns. Finally, a 100-nanosecond MD simulation was performed at 298K, 1 bar to produce isothermal-  
627 isobaric ensemble ensembles. In total, 1,000 snapshots were recorded from the last phase simulation

628 for post-analysis using “cpptray” module implement in the AMBER software package. Binding free  
629 energy decomposition and correlation analysis were performed using an internal program and the  
630 detailed elsewhere [53,54].  
631

632 **Author Contributions:** B.M.X. optimized the CHS-stimulated ATPase assay for ABCG5/G8; A.A.Z. generated  
633 and validated the mutant constructs; B.M.X., A.A.Z. and A.V. purified the proteins and carried out the ATPase  
634 assays and data analysis. J.W. performed the molecular dynamics simulation, J.-Y.L. oversaw the project, and  
635 J.W. and J.-Y.L. wrote the manuscript. All authors have read and agreed to the submitted version of the  
636 manuscript.

637 **Funding:** This research was funded by a startup grant from the University of Ottawa, a Discovery Grant from  
638 the Natural Sciences and Engineering Research Council (RGPIN 2018-04070), and a National New Investigator  
639 Award from the Heart and Stroke Foundation of Canada to J.-Y.L. and the National Institutes of Health grants  
640 (R01-GM079383 and R21-GM097617) to J.W. B.M.X. is a recipient of the Travel Awards from the Canadian  
641 Society of Molecular Biosciences (2018) and Biophysical Society of Canada (2019).

642 **Acknowledgments:** We thank William Jennings, Gloria Ihirwe, Midhet Hajira and Chloé van de Panne for  
643 technical assistance. We also thank Donna Clary and Hui Li for their technical help in utilizing the common core  
644 facilities. We are indebted to critical feedback on reviewing and editing the manuscript from Ms. Vicky Brandt,  
645 and Drs. John Baenziger, Jean-François Couture, Gregory Graf and Xiaohui Zha. This work is partially based on  
646 the theses that were submitted to fulfill in part the requirement for the degrees of Master of Science (A.A.Z.) and  
647 Honors Bachelor of Science (A.V.).

648 **Conflicts of Interest:** The authors declare no conflict of interest. The funders had no role in the design of the  
649 study; in the collection, analyses, or interpretation of data; in the writing of the manuscript, or in the decision to  
650 publish the results.  
651

## 652 Abbreviations

|        |                                                                            |
|--------|----------------------------------------------------------------------------|
| ABC    | ATP-binding cassette                                                       |
| ABCC7  | ATP-binding cassette sub-family C member 7                                 |
| ABCG5  | ATP-binding cassette sub-family G member 5                                 |
| ABCG8  | ATP-binding cassette sub-family G member 8                                 |
| ATP    | Adenosine triphosphate                                                     |
| CBP    | Calmodulin-binding peptide                                                 |
| CFTR   | Cystic fibrosis transmembrane conductance regulator                        |
| CHS    | Cholesteryl hemisuccinate                                                  |
| DDM    | Dodecyl maltoside or n-Dodecyl $\beta$ -D-maltopyranoside                  |
| DMPC   | 1,2-Dimyristoyl-sn-glycero-3-phosphocholine                                |
| DNA    | Deoxyribonucleic acid                                                      |
| DTT    | Dithiothreitol                                                             |
| EDTA   | Ethylene diamine-tetraacetic acid                                          |
| EGTA   | Ethylene glycol-bis( $\beta$ -aminoethyl ether)-N,N,N',N'-tetraacetic acid |
| ER     | Endoplasmic reticulum                                                      |
| ICL    | Intracellular loop                                                         |
| LDL    | Low-density lipoprotein                                                    |
| LOF    | Loss of function                                                           |
| LS     | Least square                                                               |
| MD     | Molecular dynamics                                                         |
| MGY    | Minimal glycerol yeast nitrogen base                                       |
| MM     | Minimal methanol                                                           |
| mPIB   | Minimum protease inhibitor buffer                                          |
| NBD    | Nucleotide-binding domain                                                  |
| NBS    | Nucleotide-binding site                                                    |
| Ni-NTA | Nickle-nitrilotriacetic acid                                               |
| PC     | Phosphatidylcholine                                                        |
| PCR    | Polymerase chain reaction                                                  |
| PDB    | Protein data bank                                                          |
| PE     | Phosphatidylethanolamine                                                   |
| PG     | Phosphatidylglycerol                                                       |
| RCT    | Reverse cholesterol transport                                              |
| RMSD   | Root mean square deviation                                                 |
| SDS    | Sodium dodecyl sulfate                                                     |
| TCEP   | Tris-(2-carboxyethyl)-phosphine                                            |
| TICE   | Transintestinal cholesterol efflux                                         |
| TMD    | Transmembrane domain                                                       |
| WT     | Wild type                                                                  |
| YNB    | Yeast nitrogen base                                                        |
| YPD    | Yeast extract peptone dextrose                                             |
| YPDS   | Yeast extract peptone dextrose sorbitol                                    |

653

654 Appendix A

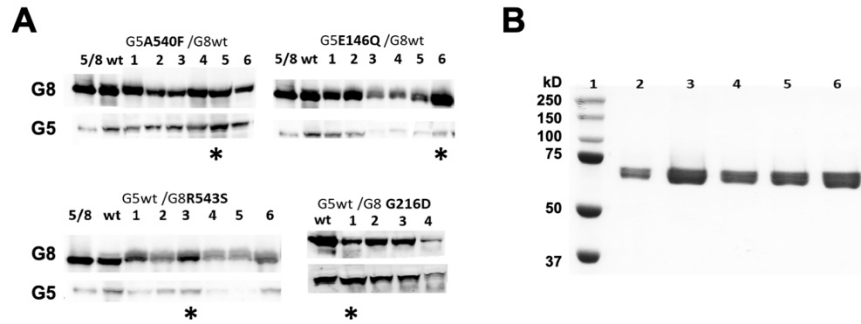

655

656

657 **Supplementary Figure 1. Expression and purification of ABCG5/G8 missense mutants.** A, Four or six yeast  
 658 colonies were selected for expression test. Crude microsomal membranes (either WT or mutants), containing 20-  
 659 30µg total proteins, were resolved by SDS-PAGE. Protein expression was analyzed by Western blotting using a  
 660 monoclonal anti-RGSH<sub>4</sub> antibody to detect ABCG5 and a polyclonal anti-human ABCG8 antibody to detect  
 661 ABCG8. The clones expressing the highest level for both subunits were selected for protein purification. Selected  
 662 clones are indicated as asterisks. B, Gel-filtration purified mutants were resolved on a 10% SDS-PAGE gel and  
 663 stained by Coomassie Blue (shown here in greyscale). Lanes 1: molecular weight marker, 2: G8-G216D, 3: G5-  
 664 E146Q, 4: G8-R543S, 5: G5-A540F, and 6: WT.

665

666

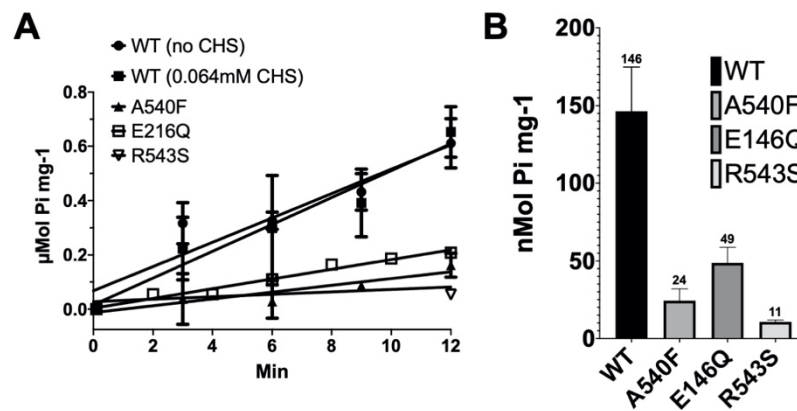

667

668 **Supplementary Figure 2. Non-CHS-stimulated ATPase activity of ABCG5/G8 .** A, The ATP hydrolysis by WT  
 669 or mutant ABCG5/G8 was measured at 37°C in presence of 5mM ATP and 0.064mM CHS, a condition that  
 670 resulted in consistent measurement of mutant-mediated ATPase activity and that has no appreciable effect on  
 671 the WT-mediated ATPase activity. An assay protocol is described in Materials and Methods. The data points are  
 672 presented as the means ± standard deviations of duplicated or triplicated experiments by using 2-4  
 673 independently purified protein preparations, where not visible, the error bars are covered by the plot symbols.  
 674 A linear regression, plotted from the first 12 minutes, is used to calculate the specific activities. B, Bar graphs  
 675 show the specific activities of non-CHS-stimulated ATP hydrolysis by WT and mutants. A540F: sterol-binding  
 676 mutant G5-A540F; E146Q: sitosterolemia mutant G5-E146Q; R543S: sitosterolemia mutant G8-R543S.

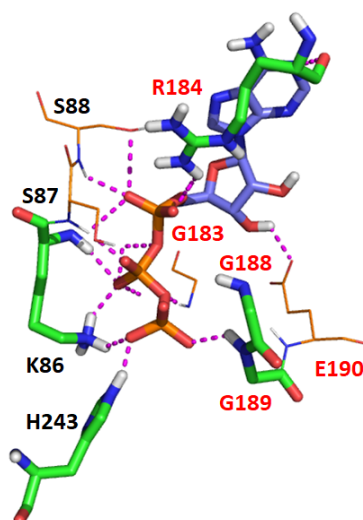

677

678 **Supplementary Figure 3. The interaction between ATP and ABCG2 revealed by a representative MD**  
679 **snapshot.** ATP is shown as bluish sticks and hotspot residues in greenish sticks ( $\Delta G_{\text{lig-res}} \leq -10.0$  kcal/mol). Other  
680 residues forming hydrogen bonds (dashed magenta lines) with ATP are shown in lines.

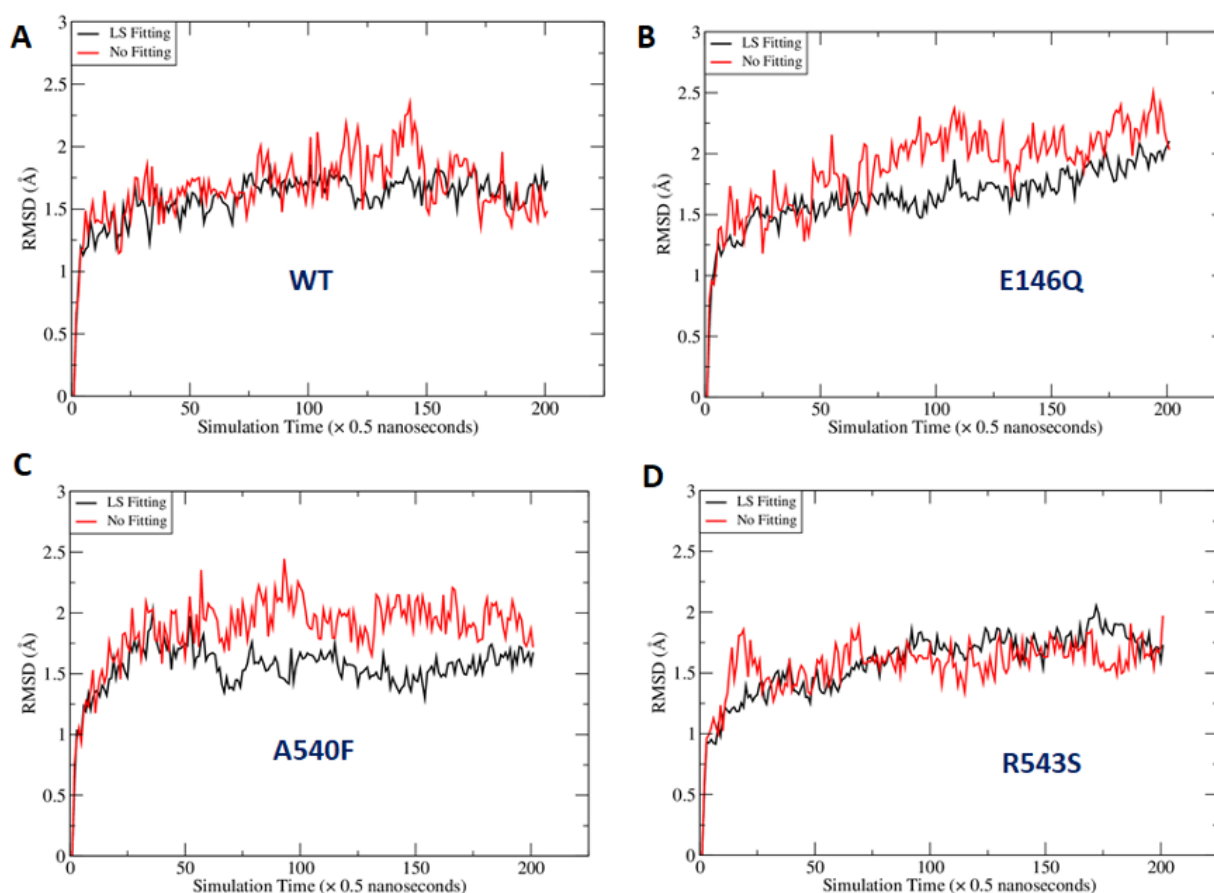

681

682 **Supplementary Figure 4. Fluctuation of Root-mean-square deviations (RMSD) along MD simulation time**  
683 **course.** RMSD were calculated for the hypothetical residues surrounding ATP under two scenarios. In the first  
684 scenario, least-square (LS) fittings were performed for the main chain atoms of the hypothetic residues which  
685 including Residues 88-103, 246-251 of G5 and 210-220, 237-245 of G8. In the second scenario, the RMSD were  
686 calculated directly for the hypothetical residues without LS Fitting after the MD snapshots were aligned to the  
687 crystal structure using the secondary structures of ABCG5/G8. The fluctuations of the first and second scenarios  
688 were illustrated using black and red curves.  
689

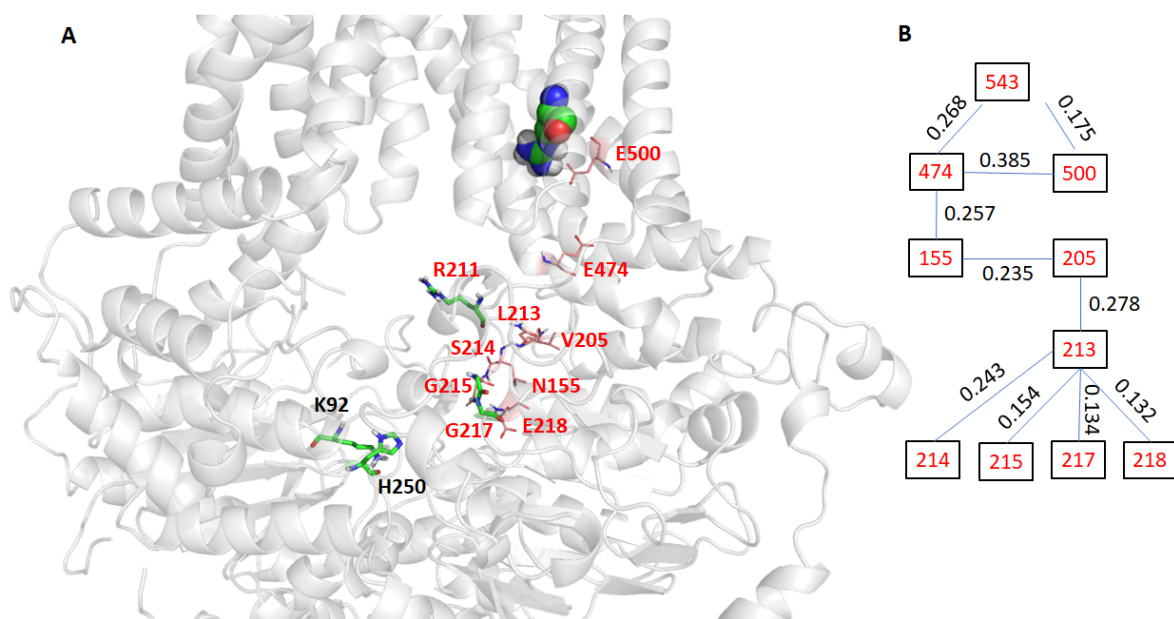

690

691 **Supplementary Figure 5. Interaction pathways link Residue R543 of ABCG8 and hotspot residues.** The  
692 hotspot residues which have ligand-residue interaction energies more potent than -10.0 kcal/mol are shown in  
693 sticks, and residues are within the interaction pathways are shown in lines and labeled in red (Panel A). The  
694 residues within the interaction pathways and the correlation between them are shown in Panel B. A correlation  
695 between two residues, which is between 0 and 1, was obtained through correlation analysis. The average  
696 correlation for all wild-type ABCG5/G8 pairs is 0.0018 and the minimum and maximum are 0 and 0.52,  
697 respectively.

698

699 **Supplementary Table 1.** List of the hotspot residues for ABCG2 and the corresponding residues in  
 700 ABCG5/G8. Hotspot residues that have ligand-residue MM-GBSA energies smaller than -7.0  
 701 kcal/mol, are shown in red.

| Chain A |      |                             |          |      | Chain B |      |                             |          |      |
|---------|------|-----------------------------|----------|------|---------|------|-----------------------------|----------|------|
| ABCG2   |      |                             | ABCG5/G8 |      | ABCG2   |      |                             | ABCG5/G8 |      |
| ID      | Type | $\Delta G_{\text{lig-res}}$ | ID       | Type | ID      | Type | $\Delta G_{\text{lig-res}}$ | ID       | Type |
| 82      | T    | -7.8                        | 88       | S    | 183     | I    | -0.1                        | 210      | V    |
| 83      | G    | -6.1                        | 89       | G    | 184     | R    | -21.7                       | 211      | R    |
| 84      | G    | -3.8                        | 90       | S    | 185     | G    | -1.8                        | 212      | G    |
| 85      | G    | -7.6                        | 91       | G    | 186     | V    | -3.7                        | 213      | L    |
| 86      | K    | -58.8                       | 92       | K    | 187     | S    | -6.1                        | 214      | S    |
| 87      | S    | 0.0                         | 93       | T    | 188     | G    | -10.1                       | 215      | G    |
| 88      | S    | -1.7                        | 94       | T    | 189     | G    | -10.6                       | 216      | G    |
| 89      | L    | -1.3                        | 95       | L    | 190     | E    | -7.1                        | 217      | E    |
| 90      | L    | -1.4                        | 96       | L    | 191     | R    | -3.5                        | 218      | R    |
| 91      | D    | 0.0                         | 97       | D    | 192     | K    | -2.1                        | 219      | R    |
| 92      | V    | -0.2                        | 98       | A    | 193     | R    | -3.9                        | 220      | R    |
| 93      | L    | -0.1                        | 99       | M    |         |      |                             |          |      |
| 94      | A    | 0.0                         | 100      | S    | 210     | D    | 0.0                         | 237      | D    |
| 95      | A    | 0.0                         | 101      | G    | 211     | Q    | -0.1                        | 238      | E    |
| 96      | R    | -0.3                        | 102      | R    | 212     | P    | 0.0                         | 239      | P    |
| 97      | K    | -5.3                        | 103      | L    | 213     | T    | 0.0                         | 240      | T    |
|         |      |                             |          |      | 214     | T    | -1.3                        | 241      | S    |
| 239     | I    | -0.2                        | 246      | V    | 215     | G    | 0.0                         | 242      | G    |
| 240     | F    | -0.9                        | 247      | L    | 216     | L    | -1.3                        | 243      | L    |
| 241     | S    | 0.0                         | 248      | T    | 217     | D    | 0.0                         | 244      | D    |
| 242     | I    | -0.2                        | 249      | I    | 218     | S    | 0.0                         | 245      | S    |
| 243     | H    | -12.6                       | 250      | H    |         |      |                             |          |      |
| 244     | Q    | -0.4                        | 251      | Q    |         |      |                             |          |      |

702



## 703 References

- 704 1. Dean, M.; Allikmets, R. Evolution of ATP-binding cassette transporter genes. *Curr. Opin.*  
705 *Genet. Dev.* **1995**, *5*, 779–785, doi:10.1016/0959-437X(95)80011-S.
- 706 2. Dean, M.; Hamon, Y.; Chimini, G. The human ATP-binding cassette (ABC) transporter  
707 superfamily. *J. Lipid Res.* **2001**, *42*, 1007–1017, doi:10.1101/gr.184901.
- 708 3. Linton, K.J.; Higgins, C.F. The Escherichia coli ATP-binding cassette (ABC) proteins. *Mol.*  
709 *Microbiol.* **1998**, *28*, 5–13, doi:10.1046/j.1365-2958.1998.00764.x.
- 710 4. Hwang, J.U.; Song, W.Y.; Hong, D.; Ko, D.; Yamaoka, Y.; Jang, S.; Yim, S.; Lee, E.; Khare, D.;  
711 Kim, K.; et al. Plant ABC Transporters Enable Many Unique Aspects of a Terrestrial Plant's  
712 Lifestyle. *Mol. Plant* **2016**, *9*, 338–355, doi:10.1016/j.molp.2016.02.003.
- 713 5. Li, G.; Gu, H.M.; Zhang, D.W. ATP-binding cassette transporters and cholesterol  
714 translocation. *IUBMB Life* **2013**, *65*, 505–512, doi:10.1002/iub.1165.
- 715 6. Patel, S.B.; Graf, G.A.; Temel, R.E. ABCG5 and ABCG8: more than a defense against  
716 xenosterols. *J. Lipid Res.* **2018**, *59*, 1103–1113, doi:10.1194/jlr.R084244.
- 717 7. Borst, P.; Zelcer, N.; Van Helvoort, A. ABC transporters in lipid transport. *Biochim. Biophys.*  
718 *Acta - Mol. Cell Biol. Lipids* **2000**, *1486*, 128–144, doi:10.1016/S1388-1981(00)00053-6.
- 719 8. Xavier, B.M.; Jennings, W.J.; Zein, A.A.; Wang, J.; Lee, J.Y. Structural snapshot of the  
720 cholesterol-transport ATP-binding cassette proteins. *Biochem. Cell Biol.* **2019**, *97*, 224–233,  
721 doi:10.1139/bcb-2018-0151.
- 722 9. Graf, G.A.; Li, W.-P.; Gerard, R.D.; Gelissen, I.; White, A.; Cohen, J.C.; Hobbs, H.H.  
723 Coexpression of ATP-binding cassette proteins ABCG5 and ABCG8 permits their transport to  
724 the apical surface. *J. Clin. Invest.* **2002**, *110*, 659–669, doi:10.1172/jci16000.
- 725 10. Graf, G.A.; Yu, L.; Li, W.P.; Gerard, R.; Tuma, P.L.; Cohen, J.C.; Hobbs, H.H. ABCG5 and  
726 ABCG8 Are Obligate Heterodimers for Protein Trafficking and Biliary Cholesterol Excretion.  
727 *J. Biol. Chem.* **2003**, *278*, 48275–48282, doi:10.1074/jbc.M310223200.
- 728 11. Bhattacharyya, A.K.; Connor, W.E.; Lin, D.S.; McMurry, M.M.; Shulman, R.S. Sluggish  
729 sitosterol turnover and hepatic failure to excrete sitosterol into bile cause expansion of body  
730 pool of sitosterol in patients with sitosterolemia and xanthomatosis. *Arterioscler. Thromb. A J.*  
731 *Vasc. Biol.* **1991**, *11*, 1287–1294, doi:10.1161/01.atv.11.5.1287.
- 732 12. Yu, L.; Hammer, R.E.; Li-Hawkins, J.; Von Bergmann, K.; Lutjohann, D.; Cohen, J.C.; Hobbs,  
733 H.H. Disruption of Abcg5 and Abcg8 in mice reveals their crucial role in biliary cholesterol  
734 secretion. *Proc. Natl. Acad. Sci. U. S. A.* **2002**, *99*, 16237–16242, doi:10.1073/pnas.252582399.
- 735 13. Klett, E.L.; Lu, K.; Kusters, A.; Vink, E.; Lee, M.-H.H.; Altenburg, M.; Shefer, S.; Batta, A.K.;  
736 Yu, H.; Chen, J.; et al. A mouse model of sitosterolemia: Absence of Abcg8/sterolin-2 results

- 737 in failure to secrete biliary cholesterol. *BMC Med.* **2004**, *2*, 5, doi:10.1186/1741-7015-2-5.
- 738 14. Plösch, T.; Bloks, V.W.; Terasawa, Y.; Berdy, S.; Siegler, K.; Van Der Sluijs, F.; Kema, I.P.;  
739 Groen, A.K.; Shan, B.; Kuipers, F.; et al. Sitosterolemia in ABC-Transporter G5-deficient mice  
740 is aggravated on activation of the liver-X receptor. *Gastroenterology* **2004**, *126*, 290–300,  
741 doi:10.1053/j.gastro.2003.10.074.
- 742 15. Jakulj, L.; van Dijk, T.H.; de Boer, J.F.; Kootte, R.S.; Schonewille, M.; Paalvast, Y.; Boer, T.;  
743 Bloks, V.W.; Boverhof, R.; Nieuwdorp, M.; et al. Transintestinal Cholesterol Transport Is  
744 Active in Mice and Humans and Controls Ezetimibe-Induced Fecal Neutral Sterol Excretion.  
745 *Cell Metab.* **2016**, *24*, 783–794, doi:10.1016/j.cmet.2016.10.001.
- 746 16. Ford, R.C.; Beis, K. Learning the ABCs one at a time: structure and mechanism of ABC  
747 transporters. *Biochem. Soc. Trans.* **2019**, *47*, 23–36, doi:10.1042/BST20180147.
- 748 17. Takahashi, K.; Kimura, Y.; Kioka, N.; Matsuo, M.; Ueda, K. Purification and ATPase activity  
749 of human ABCA1. *J. Biol. Chem.* **2006**, *281*, 10760–10768, doi:10.1074/jbc.M513783200.
- 750 18. Zhang, D.W.; Graf, G.A.; Gerard, R.D.; Cohen, J.C.; Hobbs, H.H. Functional asymmetry of  
751 nucleotide-binding domains in ABCG5 and ABCG8. *J. Biol. Chem.* **2006**, *281*, 4507–4516,  
752 doi:10.1074/jbc.M512277200.
- 753 19. Hirayama, H.; Kimura, Y.; Kioka, N.; Matsuo, M.; Ueda, K. ATPase activity of human ABCG1  
754 is stimulated by cholesterol and sphingomyelin. *J. Lipid Res.* **2013**, *54*, 496–502,  
755 doi:10.1194/jlr.M033209.
- 756 20. Wang, J.; Grishin, N.; Kinch, L.; Cohen, J.C.; Hobbs, H.H.; Xie, X.S. Sequences in the  
757 nonconsensus nucleotide-binding domain of ABCG5/ABCG8 required for sterol transport. *J.*  
758 *Biol. Chem.* **2011**, *286*, 7308–7314, doi:10.1074/jbc.M110.210880.
- 759 21. Lee, J.-Y.Y.; Kinch, L.N.; Borek, D.M.; Wang, J.J.; Wang, J.J.; Urbatsch, I.L.; Xie, X.-S.S.; Grishin,  
760 N. V.; Cohen, J.C.; Otwinowski, Z.; et al. Crystal structure of the human sterol transporter  
761 ABCG5/ABCG8. *Nature* **2016**, *533*, 561–4, doi:10.1038/nature17666.
- 762 22. Zein, A.A.; Kaur, R.; Hussein, T.O.K.; Graf, G.A.; Lee, J.Y. ABCG5/G8: A structural view to  
763 pathophysiology of the hepatobiliary cholesterol secretion. *Biochem. Soc. Trans.* **2019**, *47*, 1259–  
764 1268, doi:10.1042/BST20190130.
- 765 23. Berge, K.E.; Tian, H.; Graf, G.A.; Yu, L.; Grishin, N. V.; Schultz, J.; Kwiterovich, P.; Shan, B.;  
766 Barnes, R.; Hobbs, H.H. Accumulation of dietary cholesterol in sitosterolemia caused by  
767 mutations in adjacent ABC transporters. *Science (80-. )*. **2000**, *290*, 1771–1775,  
768 doi:10.1126/science.290.5497.1771.
- 769 24. Lu, K.; Lee, M.H.; Hazard, S.; Brooks-Wilson, A.; Hidaka, H.; Kojima, H.; Ose, L.; Stalenhoef,  
770 A.F.H.; Mietinnen, T.; Bjorkhem, I.; et al. Two genes that map to the STSL locus cause  
771 sitosterolemia: genomic structure and spectrum of mutations involving sterolin-1 and

- 772 sterolin-2, encoded by ABCG5 and ABCG8, respectively. *Am. J. Hum. Genet.* **2001**, *69*, 278–90,  
773 doi:10.1086/321294.
- 774 25. Buch, S.; Schafmayer, C.; Völzke, H.; Becker, C.; Franke, A.; Von Eller-Eberstein, H.; Kluck, C.;  
775 Bässmann, I.; Brosch, M.; Lammert, F.; et al. A genome-wide association scan identifies the  
776 hepatic cholesterol transporter ABCG8 as a susceptibility factor for human gallstone disease.  
777 *Nat. Genet.* **2007**, *39*, 995–999, doi:10.1038/ng2101.
- 778 26. Kuo, K.-K.K.; Shin, S.-J.J.; Chen, Z.-C.C.; Yang, Y.-H.H.C.C.; Yang, J.-F.F.; Hsiao, P.-J.J.  
779 Significant association of ABCG5 604Q and ABCG8 D19H polymorphisms with gallstone  
780 disease. *Br. J. Surg.* **2008**, *95*, 1005–1011, doi:10.1002/bjs.6178.
- 781 27. Chen, Z.C.; Shin, S.J.; Kuo, K.K.; Lin, K. Der; Yu, M.L.; Hsiao, P.J. Significant association of  
782 ABCG8:D19H gene polymorphism with hypercholesterolemia and insulin resistance. *J. Hum.*  
783 *Genet.* **2008**, *53*, 757–763, doi:10.1007/s10038-008-0310-2.
- 784 28. Kajinami, K.; Brousseau, M.E.; Ordovas, J.M.; Schaefer, E.J. Interactions between common  
785 genetic polymorphisms in ABCG5/G8 and CYP7A1 on LDL cholesterol-lowering response to  
786 atorvastatin. *Atherosclerosis* **2004**, *175*, 287–93, doi:10.1016/j.atherosclerosis.2004.03.015.
- 787 29. Graf, G.A.; Cohen, J.C.; Hobbs, H.H. Missense mutations in ABCG5 and ABCG8 disrupt  
788 heterodimerization and trafficking. *J. Biol. Chem.* **2004**, *279*, 24881–24888,  
789 doi:10.1074/jbc.M402634200.
- 790 30. Lukacs, G.L.; Mohamed, A.; Kartner, N.; Chang, X.B.; Riordan, J.R.; Grinstein, S.  
791 Conformational maturation of CFTR but not its mutant counterpart ( $\Delta F508$ ) occurs in the  
792 endoplasmic reticulum and requires ATP. *EMBO J.* **1994**, *13*, 6076–6086, doi:10.1002/j.1460-  
793 2075.1994.tb06954.x.
- 794 31. Kizhakkedath, P.; John, A.; Al-Sawafi, B.K.; Al-Gazali, L.; Ali, B.R. Endoplasmic reticulum  
795 quality control of LDLR variants associated with familial hypercholesterolemia. *FEBS Open*  
796 *Bio* **2019**, *9*, 1994–2005, doi:10.1002/2211-5463.12740.
- 797 32. Müller, M.; Klein, I.; Kopácsi, S.; Remaley, A.T.; Rajnavölgyi, E.; Sarkadi, B.; Váradi, A. Co-  
798 expression of human ABCG5 and ABCG8 in insect cells generates an androstan stimulated  
799 membrane ATPase activity. *FEBS Lett.* **2006**, *580*, 6139–44, doi:10.1016/j.febslet.2006.10.012.
- 800 33. Johnson, B.J.H.; Lee, J.Y.; Pickert, A.; Urbatsch, I.L. Bile acids stimulate atp hydrolysis in the  
801 purified cholesterol transporter ABCG5/G8. *Biochemistry* **2010**, *49*, 3403–3411,  
802 doi:10.1021/bi902064g.
- 803 34. Sarkadi, B.; Price, E.M.; Boucher, R.C.; Germann, U.A.; Scarborough, G.A. Expression of the  
804 human multidrug resistance cDNA in insect cells generates a high activity drug-stimulated  
805 membrane ATPase. *J. Biol. Chem.* **1992**, *267*, 4854–8.
- 806 35. Cariani, L.; Thomas, L.; Brito, J.; Del Castillo, J.R. Bismuth citrate in the quantification of

- 807 inorganic phosphate and its utility in the determination of membrane-bound phosphatases.  
808 *Anal. Biochem.* **2004**, *324*, 79–83, doi:10.1016/j.ab.2003.09.008.
- 809 36. Davies, D.R.; Hol, W.G.J. The power of vanadate in crystallographic investigations of  
810 phosphoryl transfer enzymes. *FEBS Lett.* **2004**, *577*, 315–321, doi:10.1016/j.febslet.2004.10.022.
- 811 37. Khunweeraphong, N.; Mitchell-White, J.; Szöllősi, D.; Hussein, T.; Kuchler, K.; Kerr, I.D.;  
812 Stockner, T.; Lee, J. Picky ABCG5/G8 and promiscuous ABCG2 - a tale of fatty diets and drug  
813 toxicity. *FEBS Lett.* **2020**, 1873-3468.13938, doi:10.1002/1873-3468.13938.
- 814 38. Manolaridis, I.; Jackson, S.M.; Taylor, N.M.I.; Kowal, J.; Stahlberg, H.; Locher, K.P. Cryo-EM  
815 structures of a human ABCG2 mutant trapped in ATP-bound and substrate-bound states.  
816 *Nature* **2018**, *563*, 426–430, doi:10.1038/s41586-018-0680-3.
- 817 39. Hanson, M.A.; Cherezov, V.; Griffith, M.T.; Roth, C.B.; Jaakola, V.P.; Chien, E.Y.T.; Velasquez,  
818 J.; Kuhn, P.; Stevens, R.C. A Specific Cholesterol Binding Site Is Established by the 2.8 Å  
819 Structure of the Human  $\beta$ 2-Adrenergic Receptor. *Structure* **2008**, *16*, 897–905,  
820 doi:10.1016/j.str.2008.05.001.
- 821 40. Neumann, J.; Rose-Sperling, D.; Hellmich, U.A. Diverse relations between ABC transporters  
822 and lipids: An overview. *Biochim. Biophys. Acta - Biomembr.* **2017**, *1859*, 605–618,  
823 doi:10.1016/j.bbamem.2016.09.023.
- 824 41. Kurumi, Y.; Adachi, Y.; Itoh, T.; Kobayashi, H.; Nanno, T.; Yamamoto, T. Novel high-  
825 performance liquid chromatography for determination of membrane phospholipid  
826 composition of rat hepatocytes. *Gastroenterol. Jpn.* **1991**, *26*, 628–632, doi:10.1007/BF02781680.
- 827 42. Hauser, H.; Howell, K.; Dawson, R.M.C.; Bowyer, D.E. Rabbit small intestinal brush border  
828 membrane. Preparation and lipid composition. *Biochim. Biophys. Acta - Biomembr.* **1980**, *602*,  
829 567–577, doi:10.1016/0005-2736(80)90335-1.
- 830 43. Lee, A.G. How lipids affect the activities of integral membrane proteins. *Biochim. Biophys. Acta*  
831 *- Biomembr.* **2004**, *1666*, 62–87, doi:10.1016/j.bbamem.2004.05.012.
- 832 44. Feldblum, E.S.; Arkin, I.T. Strength of a bifurcated H bond. *Proc. Natl. Acad. Sci. U. S. A.* **2014**,  
833 *111*, 4085–4090, doi:10.1073/pnas.1319827111.
- 834 45. Wang, Z.; Stalcup, L.D.; Harvey, B.J.; Weber, J.; Chloupkova, M.; Dumont, M.E.; Dean, M.;  
835 Urbatsch, I.L. Purification and ATP hydrolysis of the putative cholesterol transporters ABCG5  
836 and ABCG8. *Biochemistry* **2006**, *45*, 9929–9939, doi:10.1021/bi0608055.
- 837 46. Jorgensen, W.L.; Chandrasekhar, J.; Madura, J.D.; Impey, R.W.; Klein, M.L. Comparison of  
838 simple potential functions for simulating liquid water. *J. Chem. Phys.* **1983**, *79*, 926–935,  
839 doi:10.1063/1.445869.
- 840 47. Maier, J.A.; Martinez, C.; Kasavajhala, K.; Wickstrom, L.; Hauser, K.E.; Simmerling, C. ff14SB:  
841 Improving the Accuracy of Protein Side Chain and Backbone Parameters from ff99SB. *J. Chem.*

- 842            *Theory Comput.* **2015**, *11*, 3696–713, doi:10.1021/acs.jctc.5b00255.
- 843    48.    Dickson, C.J.; Madej, B.D.; Skjevik, Å.A.; Betz, R.M.; Teigen, K.; Gould, I.R.; Walker, R.C.  
844    Lipid14: The amber lipid force field. *J. Chem. Theory Comput.* **2014**, *10*, 865–879,  
845    doi:10.1021/ct4010307.
- 846    49.    Wang, J.; Wolf, R.M.; Caldwell, J.W.; Kollman, P.A.; Case, D.A. Development and testing of a  
847    general Amber force field. *J. Comput. Chem.* **2004**, *25*, 1157–1174, doi:10.1002/jcc.20035.
- 848    50.    Case, D.A.; Ben-Shalom, I.Y.; Brozell, S.R.; Cerutti, D.S.; Cheatham III, T.E.; Cruzeiro, V.W.D.;  
849    Darden, T.A.; Duke, R.E.; Ghoreishi, D.; Gilson, M.K. *Amber 2018; 2018; 2018*;
- 850    51.    Darden, T.; Perera, L.; Li, L.; Lee, P.; Pedersen, L. New tricks for modelers from the  
851    crystallography toolkit: The particle mesh Ewald algorithm and its use in nucleic acid  
852    simulations. *Structure* **1999**, *7*, R55–R60, doi:10.1016/s0969-2126(99)80033-1.
- 853    52.    Miyamoto, S.; Kollman, P.A. Settle: An analytical version of the SHAKE and RATTLE  
854    algorithm for rigid water models. *J. Comput. Chem.* **1992**, *13*, 952–962,  
855    doi:10.1002/jcc.540130805.
- 856    53.    Kong, Y.; Karplus, M. Signaling pathways of PDZ2 domain: a molecular dynamics interaction  
857    correlation analysis. *Proteins* **2009**, *74*, 145–54, doi:10.1002/prot.22139.
- 858    54.    Kim, P.; Li, H.; Wang, J.; Zhao, Z. Landscape of drug-resistance mutations in kinase regulatory  
859    hotspots. *Brief. Bioinform.* **2020**, doi:10.1093/bib/bbaa108.
- 860
